# Supplementary material for: An ideal platform of light-emitting materials from phenothiazine: facile preparation, tunable red/NIR fluorescence, bent geometry-promoted AIE behaviour and selective lipid-droplet (LD) tracking ability
Source: Royal Society of Chemistry journal article supplement (doi:10.1039/c9tc00143c), 2019-01-01

## SUPPORTING INFORMATION

# An ideal platform of light-emitting materials from phenothiazine: facile preparation, tunable red/NIR fluorescence, bent geometry promoted AIE behaviour and selective lipid-droplets (LDs) tracking ability

Junyi Gong,<sup>a, b, c, ‡</sup> Jinliang Han,<sup>a, ‡</sup> Qian Liu,<sup>a</sup> Xiaojie Ren,<sup>a</sup> Peifa Wei,<sup>b, c</sup> Lei Yang,<sup>a</sup> Yun Zhang,<sup>a</sup> Jing Liu,<sup>d</sup> Yongqiang Dong,<sup>d</sup> Yangang Wang<sup>\*e</sup>, Xiangzhi Song<sup>\*a, f</sup> and Ben Zhong Tang<sup>\*b, c, g</sup>

- a. *College of Chemistry and Chemical Engineering, Central South University, Changsha 410083, Hunan, China. \*E-mail: [xzsong@csu.edu.cn](mailto:xzsong@csu.edu.cn)*
- b. *Department of Chemistry, Hong Kong Branch of Chinese National Engineering Research Center of Tissue Restoration and Reconstruction, Institute of Molecular Functional Materials, Institute for Advanced Study, Division of Biomedical Engineering and Division of Life Science, The Hong Kong University of Science and Technology, Clear Water Bay, Kowloon, Hong Kong, China.*
- c. *HKUST-Shenzhen Research Institute, No. 9 Yuexing 1st RD, South Area, Hi-tech Park, Nanshan, Shenzhen 518057, China, \*E-mail: [tangbenz@ust.hk](mailto:tangbenz@ust.hk)*
- d. *Department of Chemistry, Beijing Normal University, Beijing 100875, China.*
- e. *College of Biological Chemical Science and Engineering, Jiaxing University, Jiaxing 314001, China, \*E-mail: [ygwang8136@mail.zjxu.edu.cn](mailto:ygwang8136@mail.zjxu.edu.cn)*
- f. *Key Laboratory of Hunan Province for Water Environment and Agriculture Product Safety, Changsha, Hunan 410083, China.*
- g. *NSFC Center for Luminescence from Molecular Aggregates, SCUT-HKUST Joint Research Institute, State Key Laboratory of Luminescent Materials and Devices, South China University of Technology, Guangzhou 510640, China.*

<sup>‡</sup> *J. Gong and J. Han contributed equally to this work.*

|                                                              |    |
|--------------------------------------------------------------|----|
| 1. Experimental Section.....                                 | 3  |
| Chemicals and Instrument.....                                | 3  |
| Synthesis and Characterization .....                         | 3  |
| Synthesis of PTZ-CHO.....                                    | 3  |
| Synthesis of PTZ1-11 .....                                   | 4  |
| Characterization.....                                        | 4  |
| Calculation details.....                                     | 6  |
| Optimization of chemical structures in ground state .....    | 6  |
| TD-DFT predicted UV absorption peak.....                     | 6  |
| Optimization of chemical structure of PTZ5 in S1 state ..... | 6  |
| 2. Figures .....                                             | 7  |
| Figure S1.....                                               | 7  |
| Figure S2.....                                               | 7  |
| Figure S3.....                                               | 8  |
| Figure S4.....                                               | 8  |
| Figure S5.....                                               | 9  |
| Figure S6.....                                               | 9  |
| Figure S7.....                                               | 10 |
| Figure S8.....                                               | 10 |
| Figure S9.....                                               | 10 |
| Figure S10.....                                              | 11 |
| Figure S11.....                                              | 11 |
| 3. NMR and mass spectra .....                                | 12 |
| PTZ1 .....                                                   | 12 |
| PTZ2 .....                                                   | 13 |
| PTZ3 .....                                                   | 15 |
| PTZ4 .....                                                   | 16 |
| PTZ5 .....                                                   | 18 |
| PTZ6 .....                                                   | 19 |
| PTZ7 .....                                                   | 21 |
| PTZ8 .....                                                   | 22 |
| PTZ9 .....                                                   | 23 |

|             |    |
|-------------|----|
| PTZ10 ..... | 25 |
| PTZ11 ..... | 26 |

## 1. Experimental Section

### Chemicals and Instrument

All chemicals are commercial available from Energy, J&K, Meryer and Sigma-Aldrich, respectively. The photoluminescence spectra were recorded on a Hitachi F7000 fluorometer. The UV-vis absorption spectra were determined with an Agilent UV2450 spectrometer. The absolute fluorescence quantum yields were obtained on a Hamamatsu Quantarus-QY C11347. NMR spectra were obtained from a Bruker Advance DMX 400 spectrometer. Mass spectra were got on a Bruker Daltonik MicroTOF-Q II mass spectrometer operated with ESI mode. The fluorescent lifetimes were measured on a Fluotime 100 from PicoQuant with PDL 800-B pulsed diode laser. The DFT and TD-DFT calculations were performed on a Gaussian 09 program. The single crystal data was collected on an Oxford Diffraction Xcalibur Atlas Gemini ultra instrument. The bio-imaging experiments were carried out on Opera Phenix/ Operetta CLS from Perkin Elmer, Inc. under 490-515 nm excitation and 570-650 nm emission monitoring range.

### Synthesis and Characterization

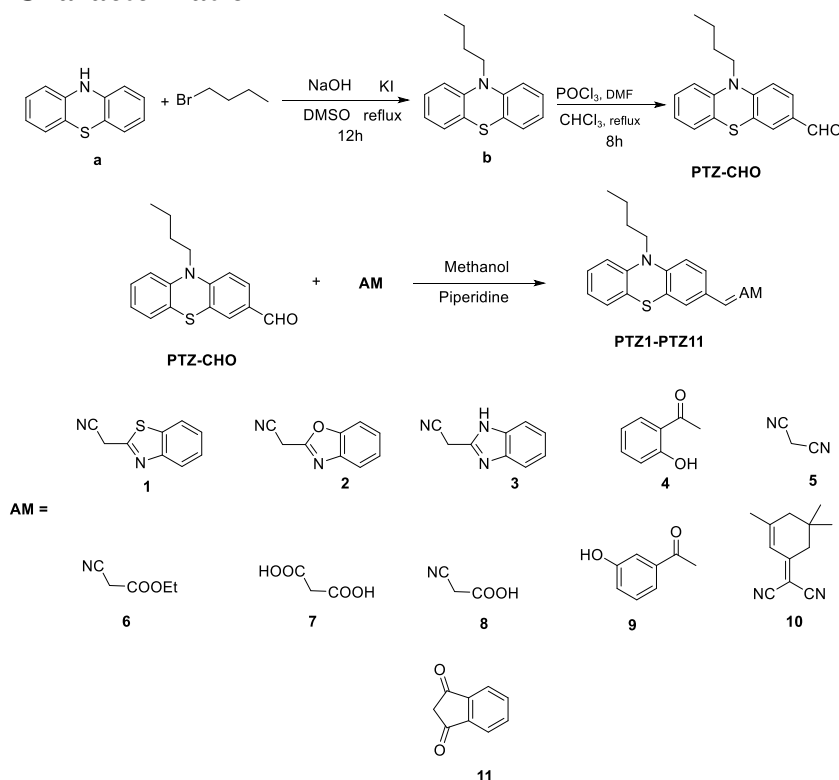

### Synthesis of PTZ-CHO

The synthesis of **PTZ-CHO** was according to the reported method. (S.H. Kim, C. Sakong, J.B. Chang, B. Kim, M.J. Ko, D.H. Kim, K.S. Hong, J.P. Kim, The effect of N-substitution and

ethylthio substitution on the performance of phenothiazine donors in dye-sensitized solar cells, *Dyes and Pigments* 97 (2013), 262-267.)

### Synthesis of PTZ1-11

To a solution of **PTZ-CHO** (2.83 g, 10.0 mmol) in methanol was added 10.0 mmol (1.0 equiv.) electron-acceptor compounds, respectively. Catalytic amount of piperidine (0.1 mL) was added into the reaction mixture. The resulting solution was stirred for 12 h. The reaction mixture was filtered and the solid was washed with methanol (20 mL) three times and then purified by recrystallization in ethyl acetate/ ethanol mixture (v: v = 1:1) to afford compounds **PTZ1- PTZ11** as yellow to dark red solids. (yield: 42.1-90.5 %).

### Characterization

**PTZ1**,  $^1\text{H}$  NMR (400 MHz,  $\text{CDCl}_3$ )  $\delta$  8.07-7.88 (m, 3H), 7.70 (s, 1H), 7.52 (t,  $J = 7.6$  Hz, 1H), 7.42 (t,  $J = 7.6$  Hz, 1H), 7.24-7.04 (m, 2H), 7.04-6.79 (m, 3H), 3.90 (t,  $J = 7.0$  Hz, 2H), 1.81 (d,  $J = 6.5$  Hz, 2H), 1.49 (dd,  $J = 14.9, 7.5$  Hz, 2H), 0.98 (t,  $J = 7.3$  Hz, 3H).

$^{13}\text{C}$  NMR (100 MHz,  $\text{CDCl}_3$ )  $\delta$  185.35, 163.66, 153.28, 148.92, 145.63, 143.24, 134.62, 130.59, 129.44, 127.59, 126.94, 126.49, 125.76, 124.88, 123.59, 123.45, 123.16, 121.64, 117.08, 115.80, 115.11, 101.55, 47.69, 28.83, 20.12, 13.80.

HRMS (ESI)  $m/z$ : calcd for  $\text{C}_{26}\text{H}_{21}\text{N}_3\text{S}_2$   $[\text{M}+\text{Na}]^+$ , 462.1075; found, 462.1009.

**PTZ2**,  $^1\text{H}$  NMR (400 MHz,  $\text{CDCl}_3$ )  $\delta$  8.15 (s, 1H), 7.95 (dt,  $J = 13.0, 6.5$  Hz, 1H), 7.84-7.72 (m, 2H), 7.62-7.54 (m, 1H), 7.45-7.35 (m, 2H), 7.18 (dd,  $J = 15.7, 8.0$  Hz, 1H), 7.12 (dt,  $J = 10.4, 5.2$  Hz, 1H), 7.06-6.86 (m, 3H), 3.92 (d,  $J = 6.4$  Hz, 1H), 1.84 (dt,  $J = 14.8, 7.4$  Hz, 2H), 1.51 (dq,  $J = 14.7, 7.4$  Hz, 2H), 1.00 (dd,  $J = 8.9, 5.9$  Hz, 3H).

$^{13}\text{C}$  NMR (100 MHz,  $\text{CDCl}_3$ )  $\delta$  159.63, 150.68, 149.22, 147.26, 143.14, 141.78, 130.74, 129.46, 127.63, 127.58, 126.32, 125.77, 125.12, 124.87, 123.66, 123.36, 120.30, 115.84, 115.70, 115.07, 110.59, 95.39, 47.71, 28.80, 20.10, 13.79.

HRMS (ESI)  $m/z$ : calcd for  $\text{C}_{26}\text{H}_{21}\text{N}_3\text{OS}$   $[\text{M}+\text{Na}]^+$ , 446.1303; found, 446.1234.

**PTZ3**,  $^1\text{H}$  NMR (500 MHz,  $\text{CDCl}_3$ )  $\delta$  8.33 (s, 1H), 7.80 (dd,  $J = 8.6, 1.8$  Hz, 1H), 7.72 (d,  $J = 1.9$  Hz, 1H), 7.64 (s, 2H), 7.34-7.30 (m, 2H), 7.18 (dd,  $J = 11.3, 4.2$  Hz, 1H), 7.13 – 7.10 (m, 1H), 6.98 (t,  $J = 7.4$  Hz, 1H), 6.91-6.86 (m, 2H), 3.92-3.87 (m, 2H), 2.07 (s, 1H), 1.82 (dt,  $J = 14.8, 7.5$  Hz, 2H), 1.50 (dd,  $J = 15.0, 7.5$  Hz, 2H), 0.99 (t,  $J = 7.4$  Hz, 3H).

$^{13}\text{C}$  NMR (100 MHz,  $\text{CDCl}_3$ )  $\delta$  148.54, 147.22, 145.23, 143.34, 139.38, 133.89, 130.42, 128.59, 127.55, 126.77, 124.79, 123.57, 123.45, 119.18, 119.04, 117.34, 116.20, 115.72, 115.00, 110.51, 110.46, 96.30, 47.60, 28.78, 20.10, 13.79.

HRMS (ESI)  $m/z$ : calcd for  $\text{C}_{26}\text{H}_{22}\text{N}_4\text{S}$   $[\text{M}+\text{H}]^+$ , 423.1643; found, 423.1577.

**PTZ4**,  $^1\text{H}$  NMR (400 MHz,  $\text{CDCl}_3$ )  $\delta$  12.94 (s, 1H), 7.96-7.88 (m, 1H), 7.81 (d,  $J = 15.3$  Hz, 1H), 7.56-7.46 (m, 2H), 7.45-7.38 (m, 2H), 7.21-7.07 (m, 2H), 7.01 (t,  $J = 6.7$  Hz, 1H), 6.94 (dd,  $J = 11.6, 4.2$  Hz, 2H), 6.92-6.83 (m, 2H), 3.95-3.80 (m, 2H), 1.86-1.74 (m, 2H), 1.46 (dt,  $J = 14.9, 7.5$  Hz, 2H), 0.99- 0.91 (m, 3H).

$^{13}\text{C}$  NMR (100 MHz,  $\text{CDCl}_3$ )  $\delta$  193.47, 163.59, 147.79, 144.48, 143.98, 136.19, 129.55, 129.30, 128.87, 127.54, 127.51, 126.71, 125.21, 123.76, 123.14, 120.16, 118.80, 118.61, 117.63, 115.71, 115.22, 47.50, 28.89, 20.14, 13.81.

HRMS (ESI)  $m/z$ : calcd for  $\text{C}_{25}\text{H}_{23}\text{NO}_2\text{S}$   $[\text{M}-\text{H}]^-$ , 400.1377; found, 400.1344.

**PTZ5**,  $^1\text{H}$  NMR (400 MHz,  $\text{CDCl}_3$ )  $\delta$  7.72 (d,  $J = 8.5$  Hz, 1H), 7.54-7.45 (m, 2H), 7.18 (dd,  $J = 16.3, 8.4$  Hz, 1H), 7.07 (d,  $J = 7.5$  Hz, 1H), 6.96 (dd,  $J = 18.3, 10.9$  Hz, 1H), 6.86 (dd,  $J = 18.3, 8.4$  Hz, 2H), 3.89 (t,  $J = 7.2$  Hz, 2H), 1.86-1.71 (m, 2H), 1.46 (dt,  $J = 15.2, 7.6$  Hz, 2H), 1.00-0.89 (m, 3H).

$^{13}\text{C}$  NMR (100 MHz,  $\text{CDCl}_3$ )  $\delta$  157.36, 150.84, 142.48, 131.39, 129.52, 127.82, 127.64, 125.19, 124.98, 124.19, 122.99, 116.10, 114.92, 114.69, 113.58, 47.92, 29.72, 28.75, 20.04, 13.74.

HRMS (ESI)  $m/z$ : calcd for  $\text{C}_{20}\text{H}_{17}\text{N}_3\text{S}$   $[\text{M}+\text{H}]^+$ , 332.1221; found, 332.1205.

**PTZ6**,  $^1\text{H}$  NMR (400 MHz,  $\text{CDCl}_3$ )  $\delta$  8.04 (s, 1H), 7.86 (dt,  $J = 9.2, 4.6$  Hz, 1H), 7.65 (d,  $J = 1.9$  Hz, 1H), 7.2-7.05 (m, 2H), 6.91 (dt,  $J = 38.1, 7.9$  Hz, 3H), 4.41-4.31 (m, 2H), 3.89 (dd,  $J = 12.6, 5.4$  Hz, 2H), 1.87 – 1.72 (m, 2H), 1.52-1.42 (m, 2H), 1.37 (dd,  $J = 14.9, 7.8$  Hz, 3H), 1.04-0.87 (m, 3H).

$^{13}\text{C}$  NMR (100 MHz,  $\text{CDCl}_3$ )  $\delta$  163.21, 153.21, 149.75, 143.07, 131.34, 130.17, 127.62, 127.59, 125.62, 124.74, 123.72, 123.38, 116.32, 115.87, 114.98, 98.82, 62.43, 47.71, 28.78, 20.08, 14.24, 13.76.

HRMS (ESI)  $m/z$ : calcd for  $\text{C}_{22}\text{H}_{22}\text{N}_2\text{O}_2\text{S}$   $[\text{M}+\text{Na}]^+$ , 401.1300; found, 401.1248.

**PTZ7**,  $^1\text{H}$  NMR (400 MHz,  $\text{CDCl}_3$ )  $\delta$  7.65 (d,  $J = 15.8$  Hz, 1H), 7.31 (d,  $J = 9.4$  Hz, 2H), 7.14 (dd,  $J = 18.5, 7.6$  Hz, 2H), 6.85 (dd,  $J = 15.9, 8.0$  Hz, 2H), 6.29 (d,  $J = 15.8$  Hz, 1H), 3.86 (s, 2H), 1.86-1.69 (m, 2H), 1.53-1.38 (m, 2H), 0.95 (t,  $J = 7.4$  Hz, 3H).

$^{13}\text{C}$  NMR (100 MHz,  $\text{CDCl}_3$ )  $\delta$  172.60, 147.54, 145.91, 144.15, 128.30, 127.45, 126.85, 125.19, 123.93, 123.03, 115.49, 115.19, 114.85, 47.39, 31.96, 29.73, 28.92, 22.73, 20.14, 13.81.

HRMS (ESI)  $m/z$ : calcd for  $\text{C}_{20}\text{H}_{19}\text{NO}_4\text{S}$   $[\text{M}+\text{Na}]^+$ , 392.0932; found, 392.1004.

**PTZ8**,  $^1\text{H}$  NMR (400 MHz, DMSO)  $\delta$  7.85 (s, 1H), 7.74 (d,  $J = 7.8$  Hz, 1H), 7.67 (s, 1H), 7.22 (t,  $J = 7.6$  Hz, 1H), 7.15 (d,  $J = 7.4$  Hz, 1H), 7.08 (dd,  $J = 16.6, 8.4$  Hz, 2H), 6.97 (t,  $J = 7.4$  Hz, 1H), 3.91 (t,  $J = 6.8$  Hz, 2H), 1.73-1.60 (m, 2H), 1.39 (dt,  $J = 14.9, 7.6$  Hz, 2H), 0.88 (t,  $J = 7.3$  Hz, 3H).

**PTZ8** was synthesized following the literature method. (S.H. Kim, C. Sakong, J.B. Chang, B. Kim, M.J. Ko, D.H. Kim, K.S. Hong, J.P. Kim, The effect of N-substitution and ethylthio substitution on the performance of phenothiazine donors in dye-sensitized solar cells, *Dyes and Pigments* 97 (2013), 262-267.)

HRMS (ESI)  $m/z$ : calcd for  $\text{C}_{20}\text{H}_{18}\text{N}_2\text{O}_2\text{S}$   $[\text{M}-\text{H}]^-$ , 349.1011; found, 349.0988.

**PTZ9**,  $^1\text{H}$  NMR (400 MHz,  $\text{CDCl}_3$ )  $\delta$  7.66 (s, 2H), 7.53 (dd,  $J = 21.0, 7.5$  Hz, 2H), 7.46 – 7.28 (m, 4H), 7.12 (dd,  $J = 9.7, 4.3$  Hz, 3H), 6.86 (s, 2H), 4.38-3.25 (m, 2H), 1.78 (s, 2H), 1.45 (dq,  $J = 14.6, 7.4$  Hz, 2H), 0.98-0.89 (m, 3H).

$^{13}\text{C}$  NMR (100 MHz,  $\text{CDCl}_3$ )  $\delta$  157.34, 150.82, 142.47, 134.61, 131.43, 129.44, 127.83, 127.62, 125.80, 125.23, 125.18, 124.97, 124.19, 122.98, 122.93, 118.67, 116.11, 114.91, 114.69, 113.59, 105.48, 47.92, 28.76, 20.04, 13.73.

HRMS (ESI)  $m/z$ : calcd for  $\text{C}_{25}\text{H}_{23}\text{NO}_2\text{S}$   $[\text{M}-\text{H}]^-$ , 400.1371; found, 400.1347.

**PTZ10**,  $^1\text{H}$  NMR (400 MHz,  $\text{CDCl}_3$ )  $\delta$  7.3-7.26 (m, 1H), 7.24 (s, 1H), 7.14 (ddd,  $J = 13.2, 8.0, 3.9$  Hz, 2H), 6.98-6.89 (m, 2H), 6.84 (td,  $J = 12.0, 6.1$  Hz, 3H), 6.78 (s, 1H), 3.86 (t,  $J = 7.2$  Hz, 2H), 2.57 (s, 2H), 2.42 (s, 2H), 1.85-1.72 (m, 2H), 1.52-1.40 (m, 2H), 1.06 (s, 6H), 0.95 (t,  $J = 7.4$  Hz, 3H).

$^{13}\text{C}$  NMR (100 MHz,  $\text{CDCl}_3$ )  $\delta$  169.20, 154.18, 146.66, 144.12, 136.07, 130.00, 127.50, 127.47, 127.21, 127.17, 126.19, 125.22, 123.81, 122.98, 122.87, 115.63, 115.38, 113.80, 113.00, 47.44, 45.67, 43.00, 39.21, 32.02, 28.91, 28.05, 25.34, 20.14, 13.83.

HRMS (ESI)  $m/z$ : calcd for  $\text{C}_{29}\text{H}_{29}\text{N}_3\text{S}$   $[\text{M}-\text{H}]^-$ , 450.2004; found, 450.1973.

**PTZ11**,  $^1\text{H}$  NMR (400 MHz,  $\text{CDCl}_3$ )  $\delta$  8.39-8.27 (m, 2H), 7.99-7.90 (m, 2H), 7.78-7.68 (m, 3H), 7.16-7.07 (m, 2H), 6.95 (t,  $J = 7.4$  Hz, 1H), 6.87 (d,  $J = 8.1$  Hz, 2H), 3.94-3.84 (m, 2H), 1.82 (dt,  $J = 14.8, 7.5$  Hz, 2H), 1.48 (dq,  $J = 14.7, 7.4$  Hz, 2H), 0.97 (t,  $J = 7.4$  Hz, 3H).

$^{13}\text{C}$  NMR (100 MHz,  $\text{CDCl}_3$ )  $\delta$  190.86, 189.53, 149.82, 145.63, 142.94, 142.40, 139.98, 135.56, 135.02, 133.11, 127.76, 127.55, 127.46, 126.34, 123.80, 123.66, 122.98, 115.80, 114.62, 47.80, 28.82, 20.10, 13.79.

HRMS (ESI)  $m/z$ : calcd for  $\text{C}_{26}\text{H}_{21}\text{NO}_2\text{S}$   $[\text{M}]^+$ , 411.1293; found, 411.1260.

## Calculation details

### Optimization of chemical structures in ground state

All chemical structures in ground state were optimized in gas phase under 6-31g\*\* with b3lyp hybrid function.

### TD-DFT predicted UV absorption peak

UV absorption maximum was predicted by TD-DFT method under def2-TZVP with b3lyp hybrid function ( $n\text{state} = 20$ ) using PCM solvent model (dichloromethane).

### Optimization of chemical structure of PTZ5 in S1 state

The equilibrium geometry of **PTZ5** in S1 state was optimized through TD-DFT method under 6-31g\*\* with b3lyp hybrid function ( $n\text{state} = 5$ ,  $\text{root} = 1$ ).

## 2. Figures

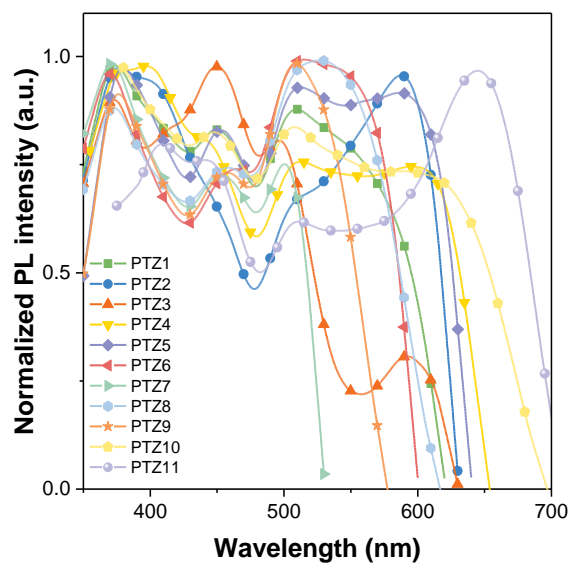

**Figure S1.** Excitation spectra of photoluminescence of **PTZ-PTZ11** in solid state.

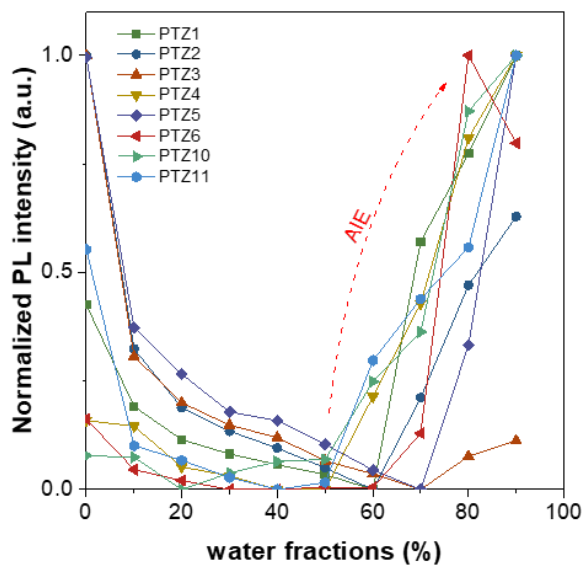

**Figure S2.** Plots of Normalized PL intensity *versus* water fractions for **PTZ** dyes.

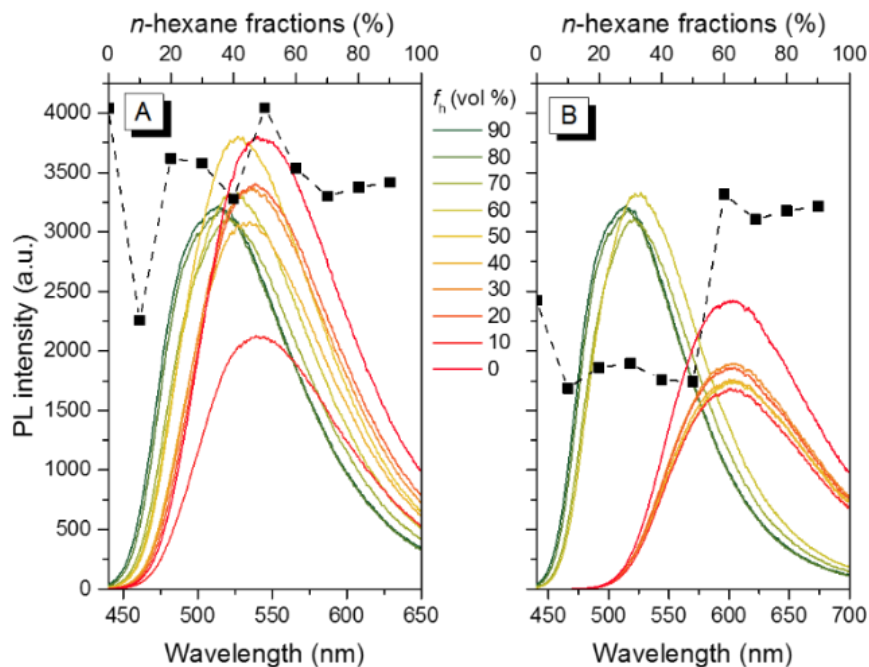

**Figure S3.** PL spectra (coloured solid lines) and PL intensity versus *n*-hexane fractions plots (black dash lines) of **PTZ7** (A) and **PTZ8** (B) in THF/*n*-hexane mixture with different *n*-hexane fractions.

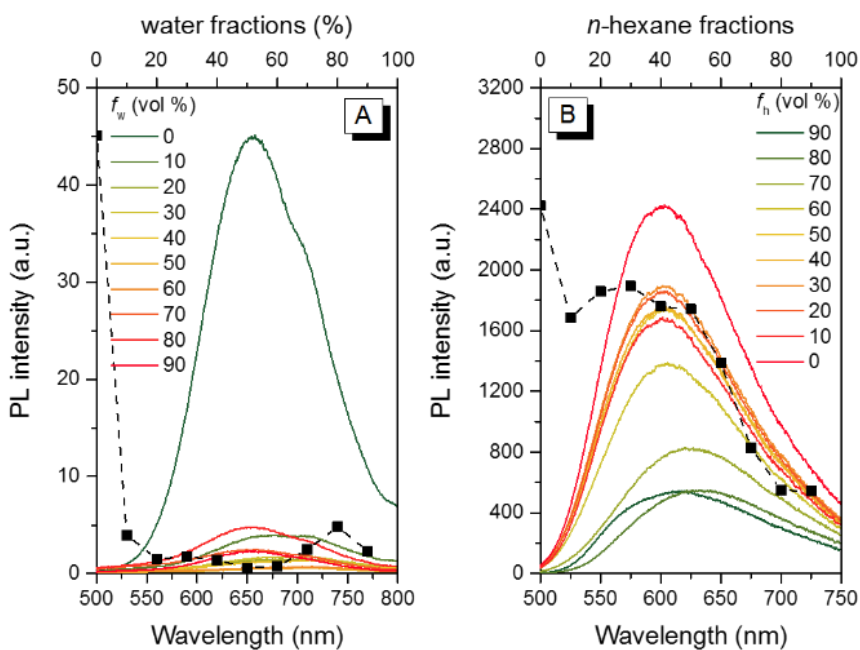

**Figure S4.** PL spectra and PL intensity versus *n*-hexane or water fractions plots of **PTZ9** in acetonitrile/water mixture (A) and THF/*n*-hexane mixture (B).



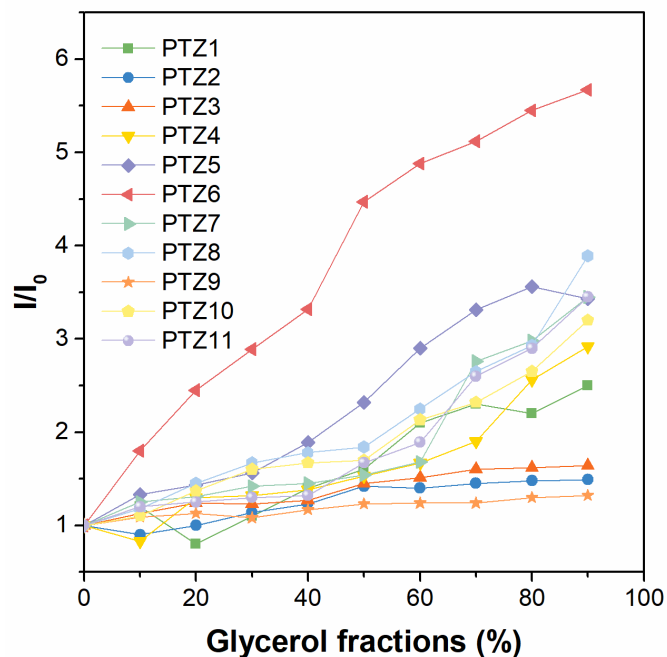

**Figure S5.** PL intensity change of **PTZ1-PTZ11** dispersed in methanol-glycerol mixtures as a function of the glycerol fractions.  $I_0$  stands for the PL intensity under  $f_g = 0$ .

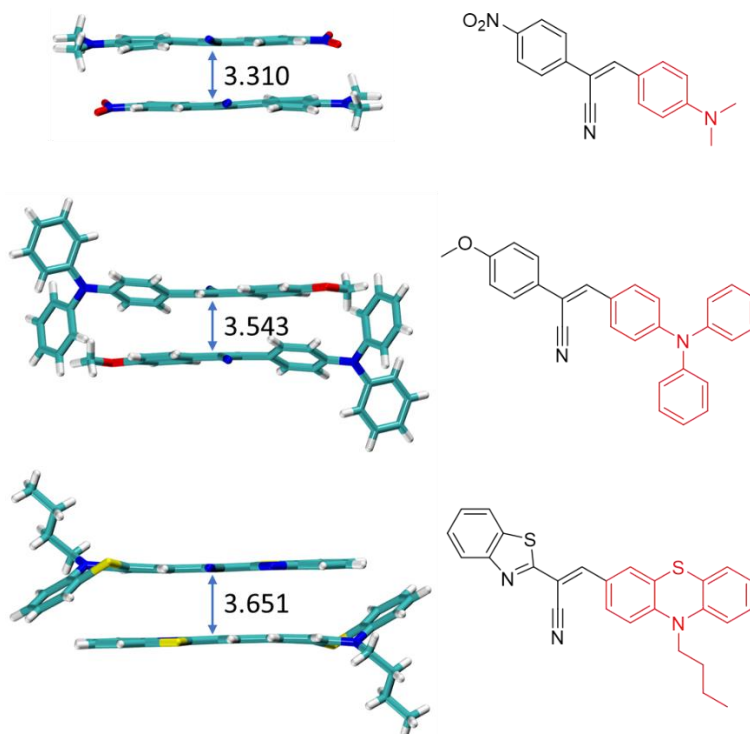

**Figure S6.** Distances of neighbouring  $\pi$  system of D- $\pi$ -A structure with different electron donors.

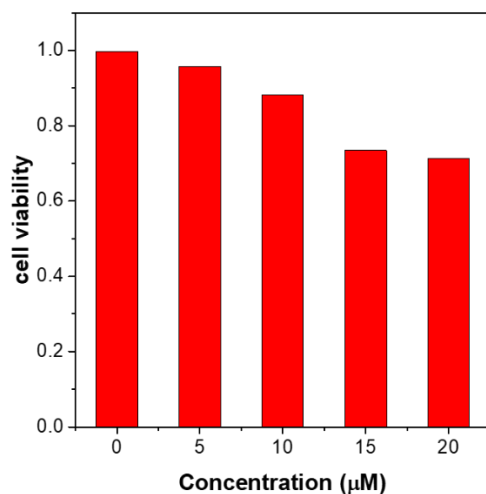

**Figure S7.** Cytotoxicity of **PTZ6** in HeLa cells determined by MTT assay.

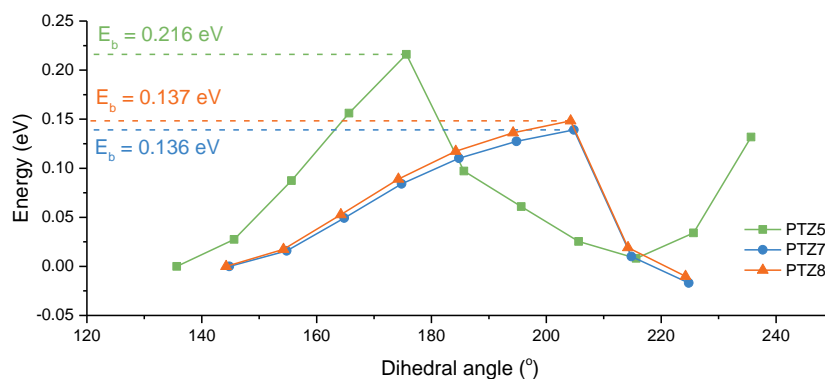

**Figure S8.** The scanned energy surface of **PTZ5**, **PTZ7** and **PTZ8** in varied dihedral angle between benzene ring A and B.

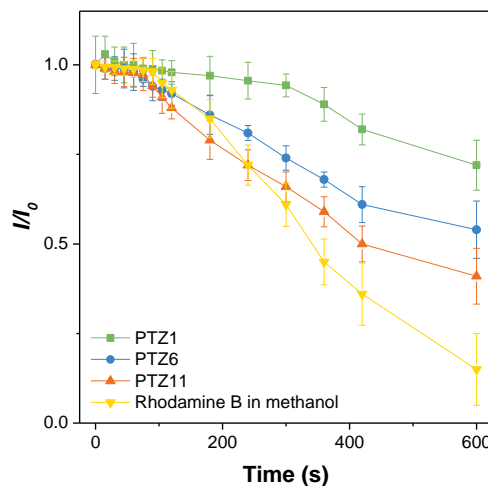

**Figure S9.** Relative fluorescence intensities of **PTZ1**, **PTZ6** and **PTZ11** in THF-water mixture (80% water) using rhodamine B in methanol as a reference.

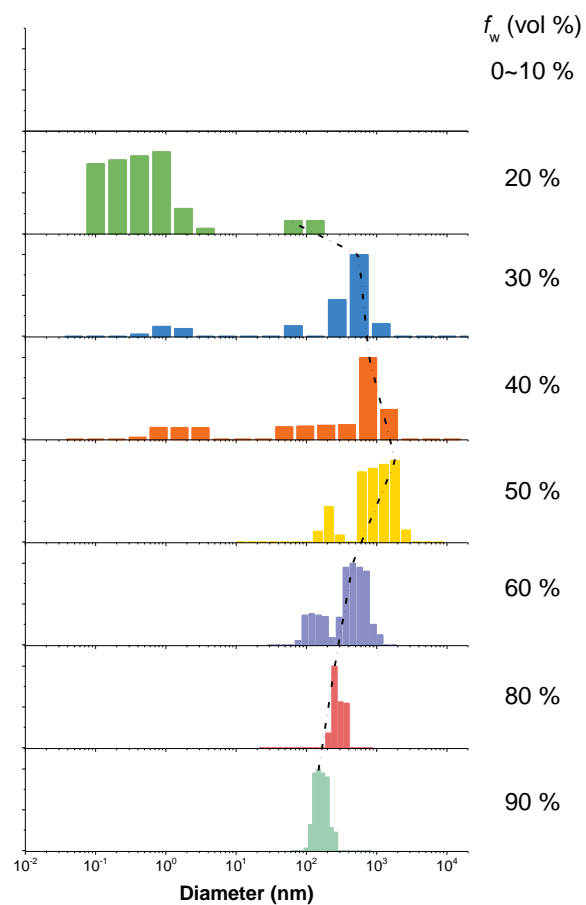

**Figure S10.** Particle size distribution of **PTZ5** dispersed in THF-water mixture with different water fractions.

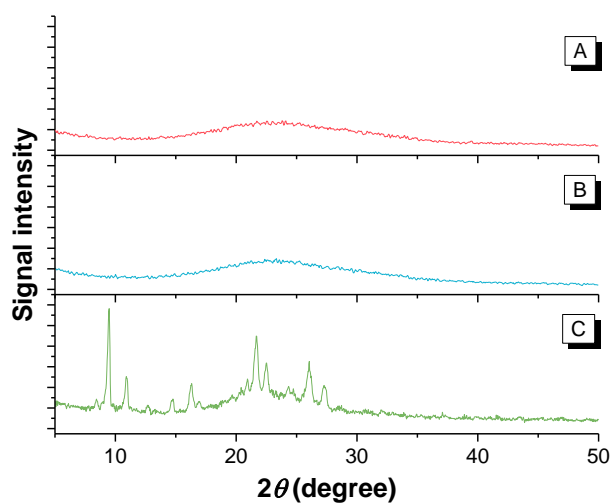

**Figure S11.** Powder-XRD patterns of **PTZ5** in aggregation (A), amorphous powder (B) and crystalline (C) states.

### 3. NMR and mass spectra

PTZ1

HRMS

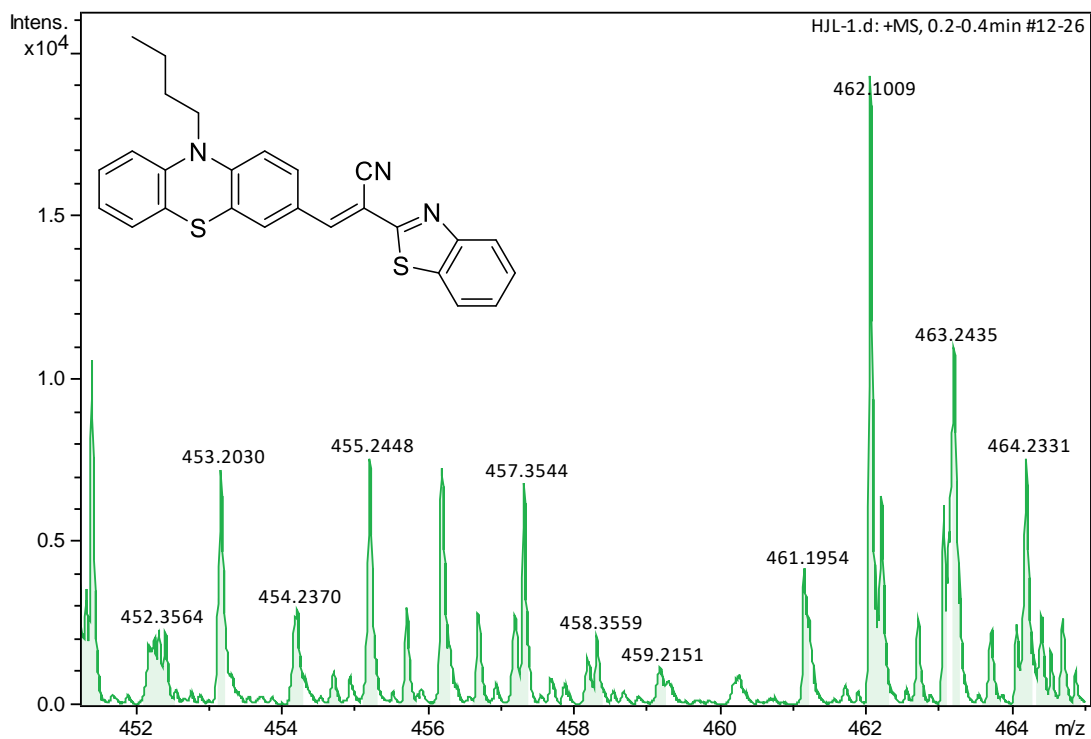

$^1\text{H-NMR}$

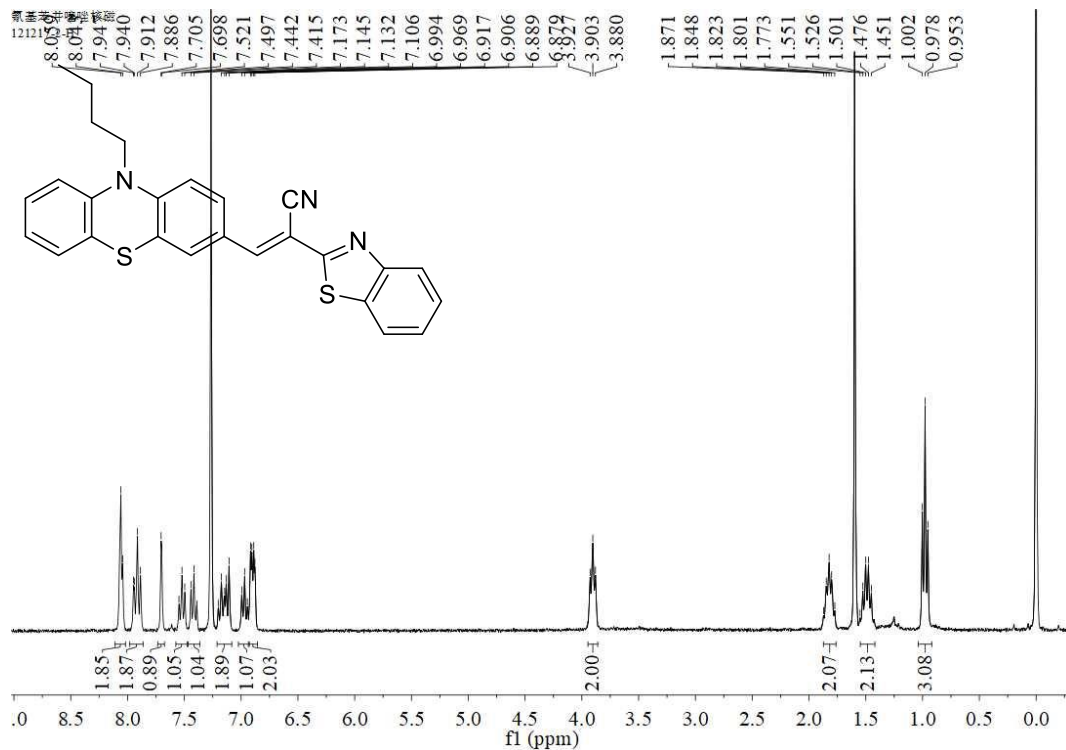

# <sup>13</sup>C-NMR

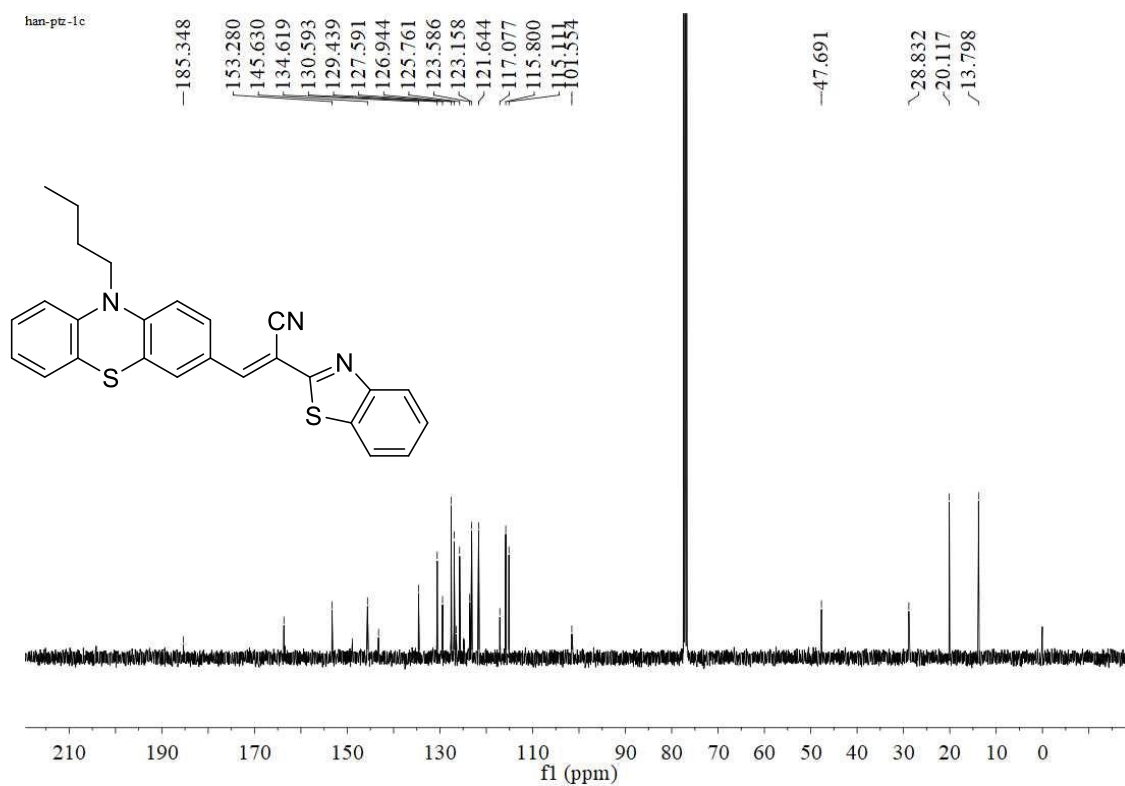

# PTZ2 HRMS

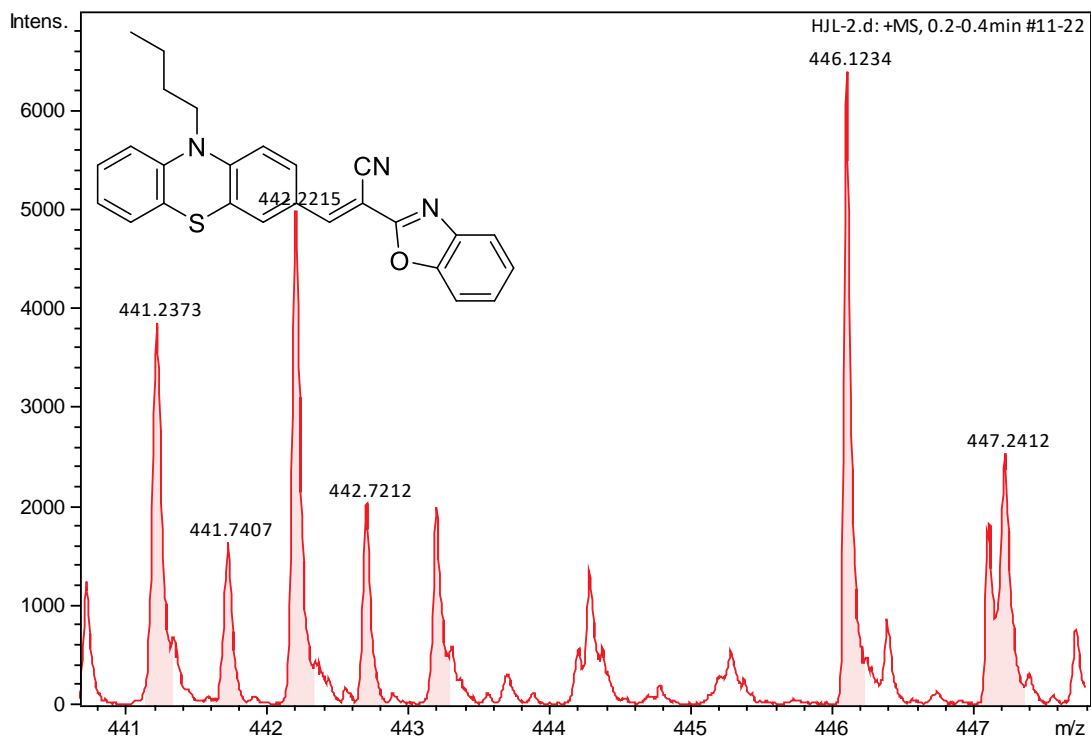

# <sup>1</sup>H-NMR

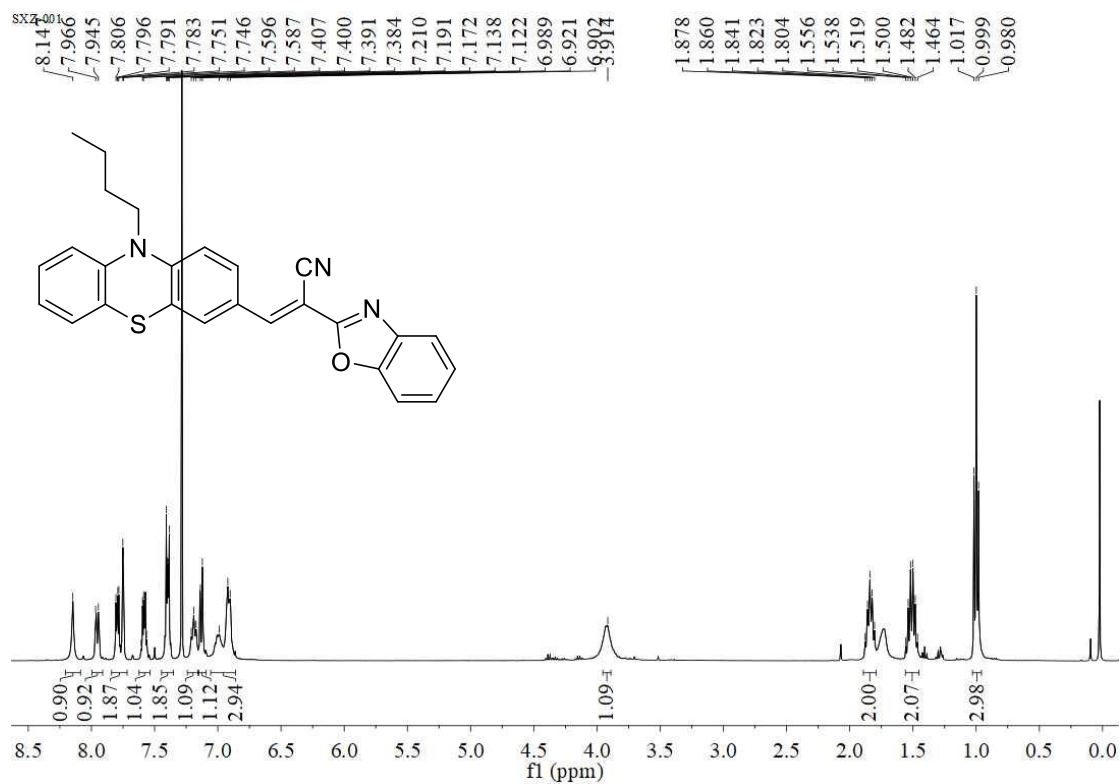

# <sup>13</sup>C-NMR

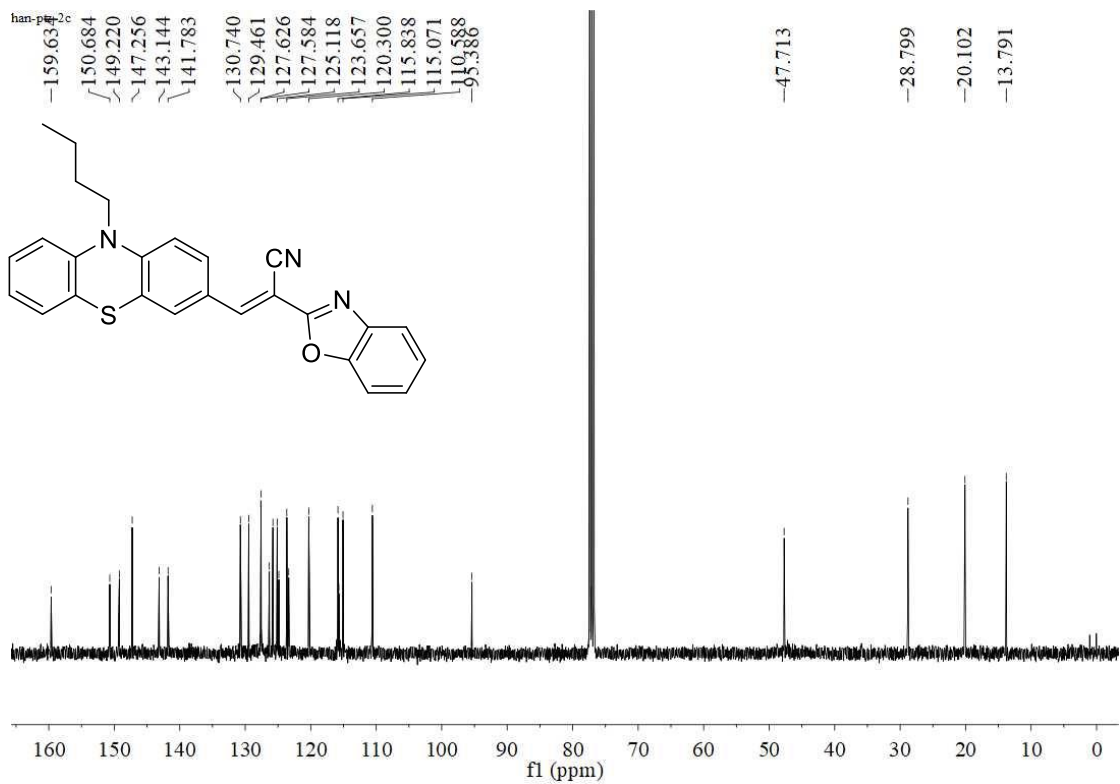

**PTZ3**  
HRMS

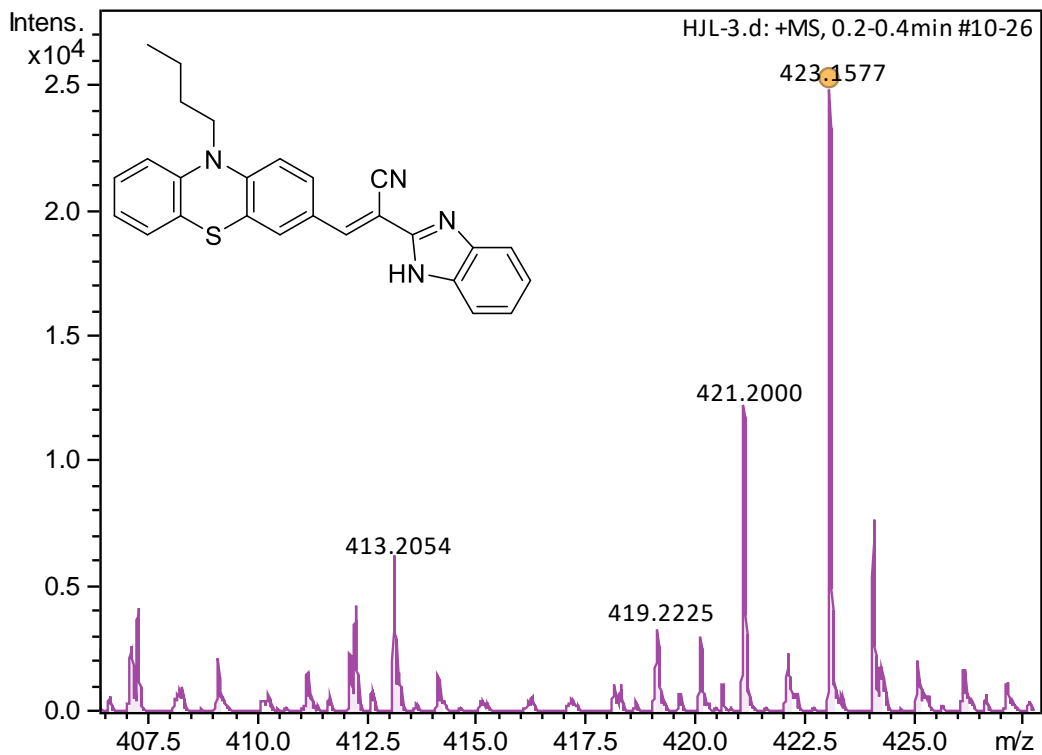

<sup>1</sup>H-NMR

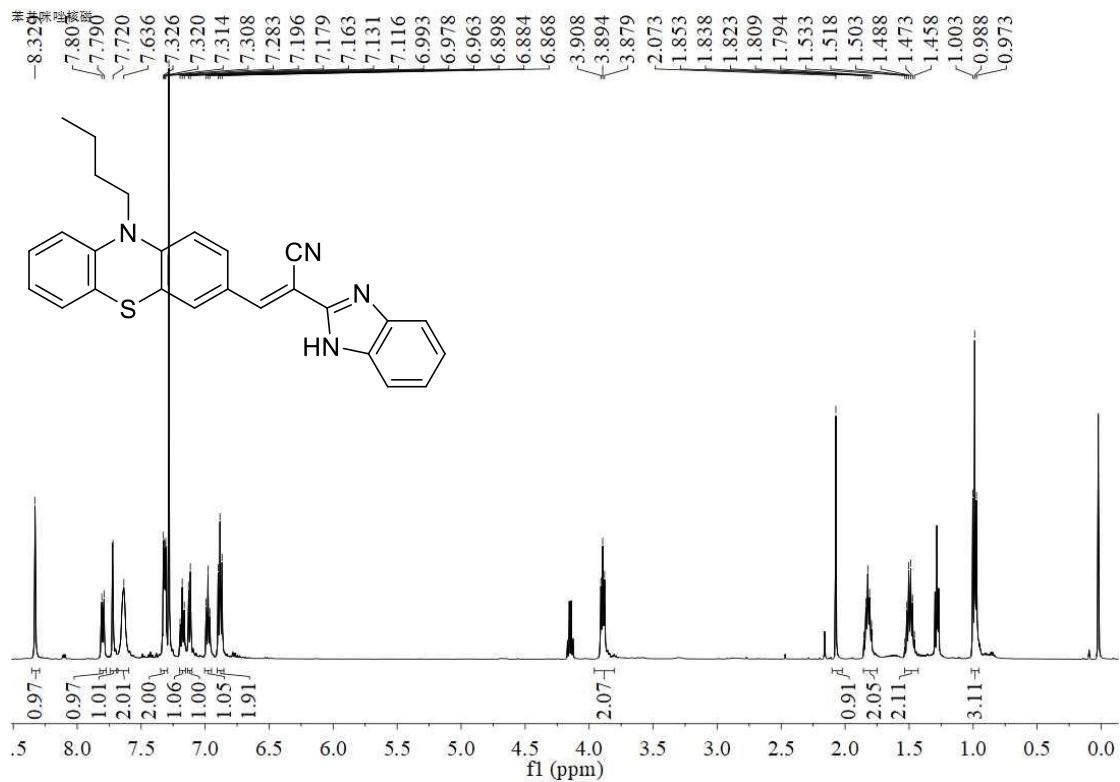

### <sup>13</sup>C-NMR

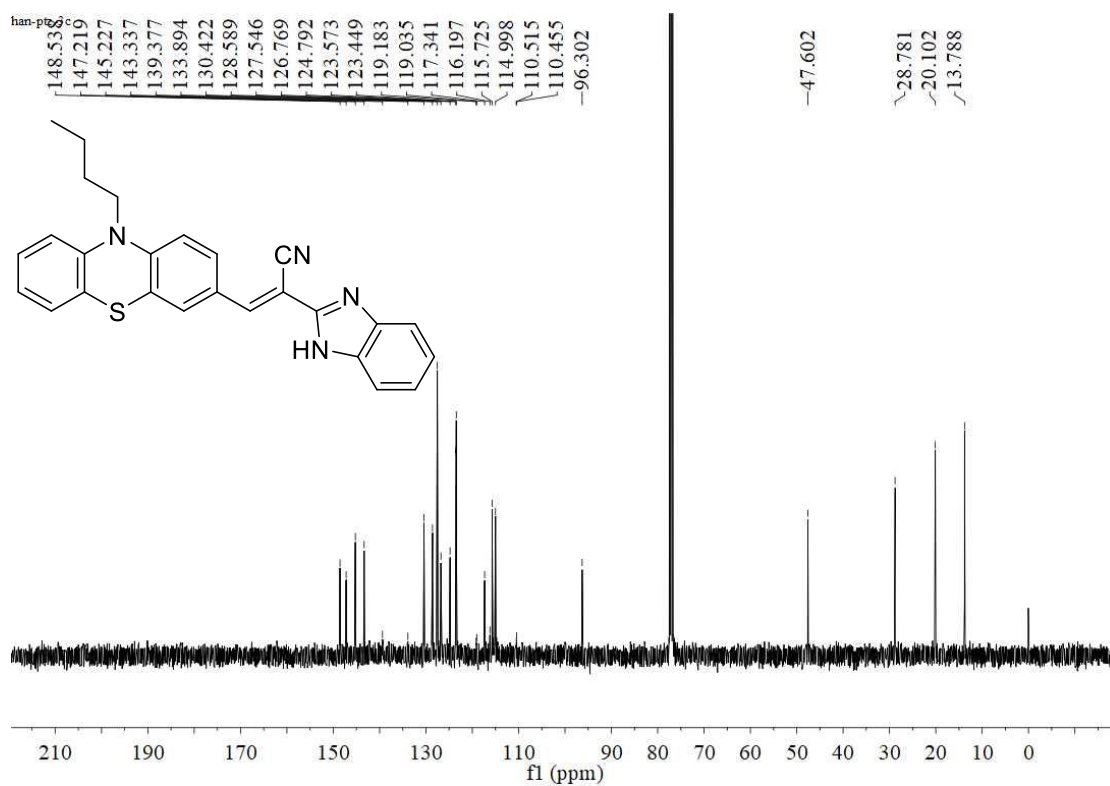

### PTZ4 HRMS

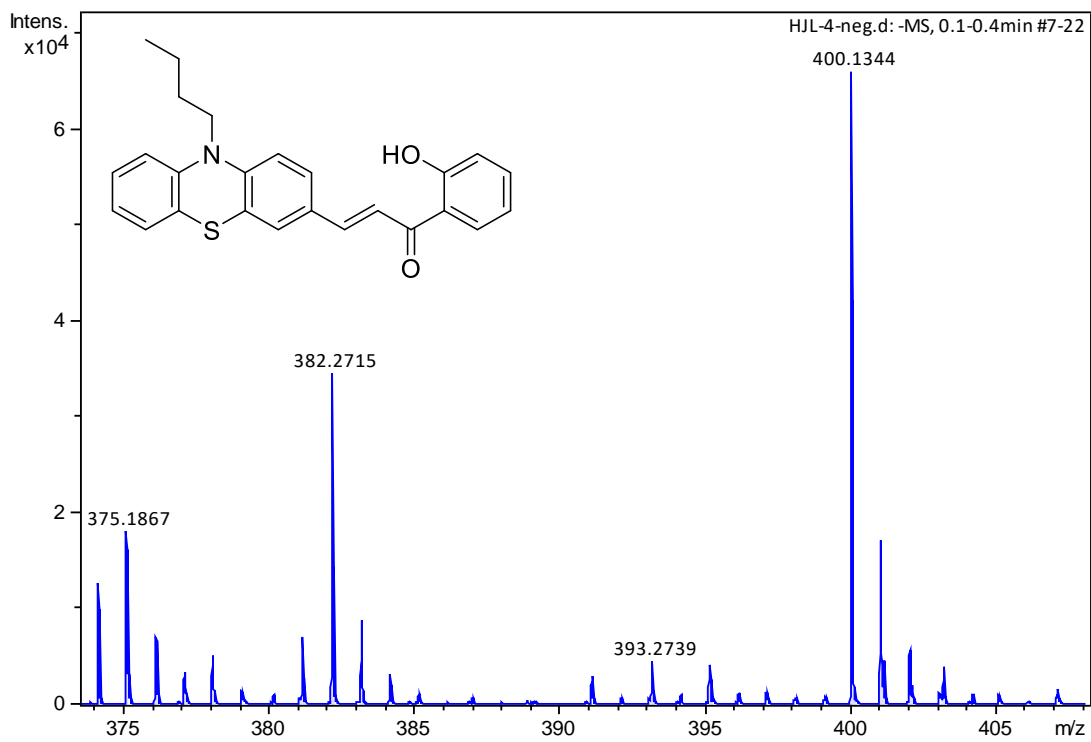



# <sup>1</sup>H-NMR

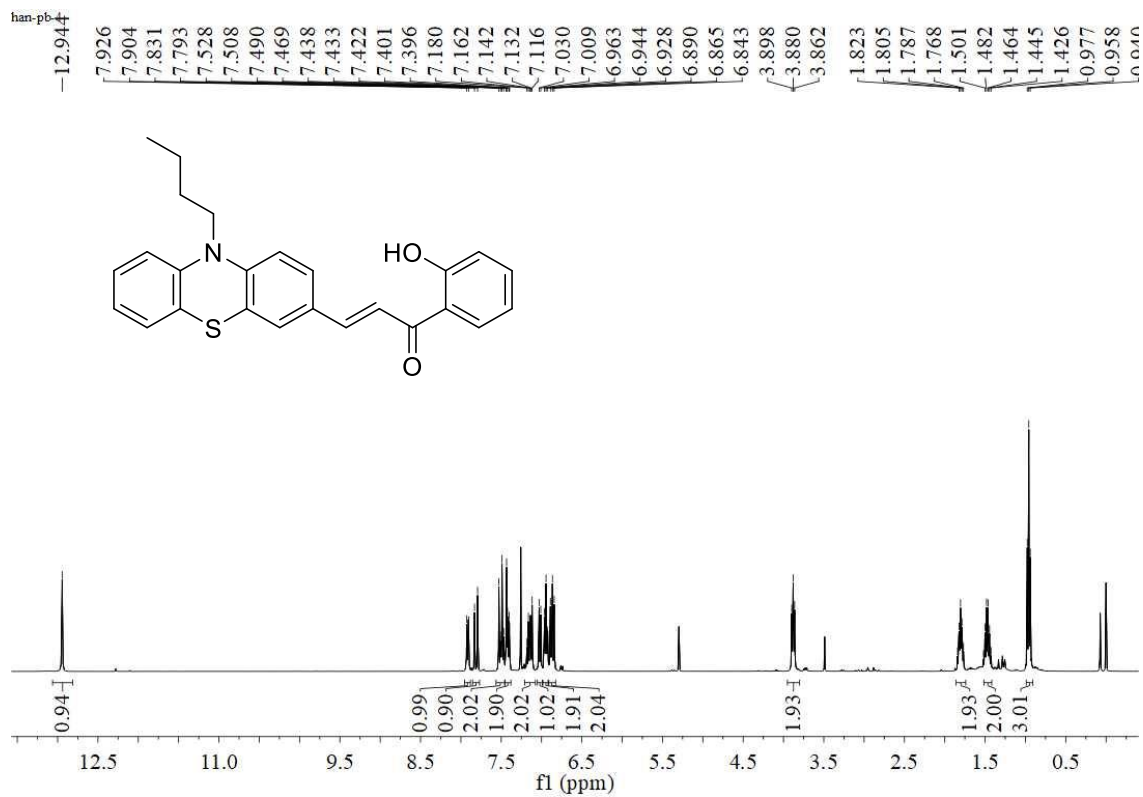

# <sup>13</sup>C-NMR

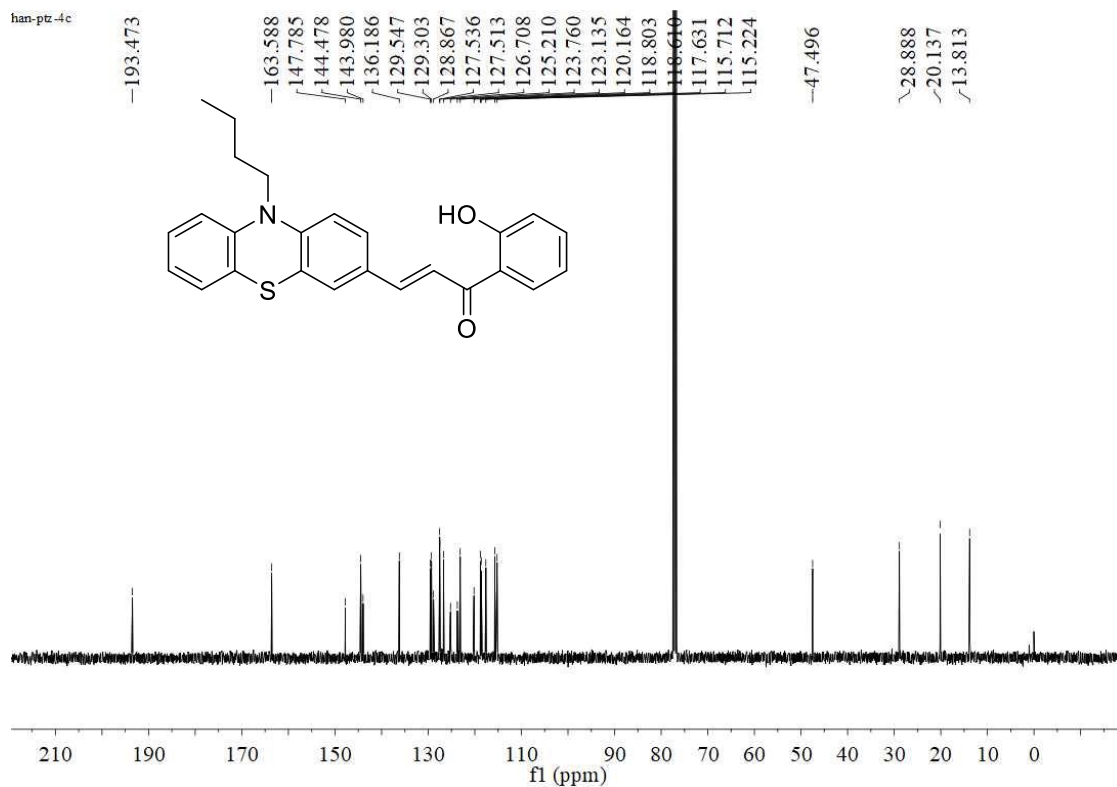

**PTZ5**  
HRMS

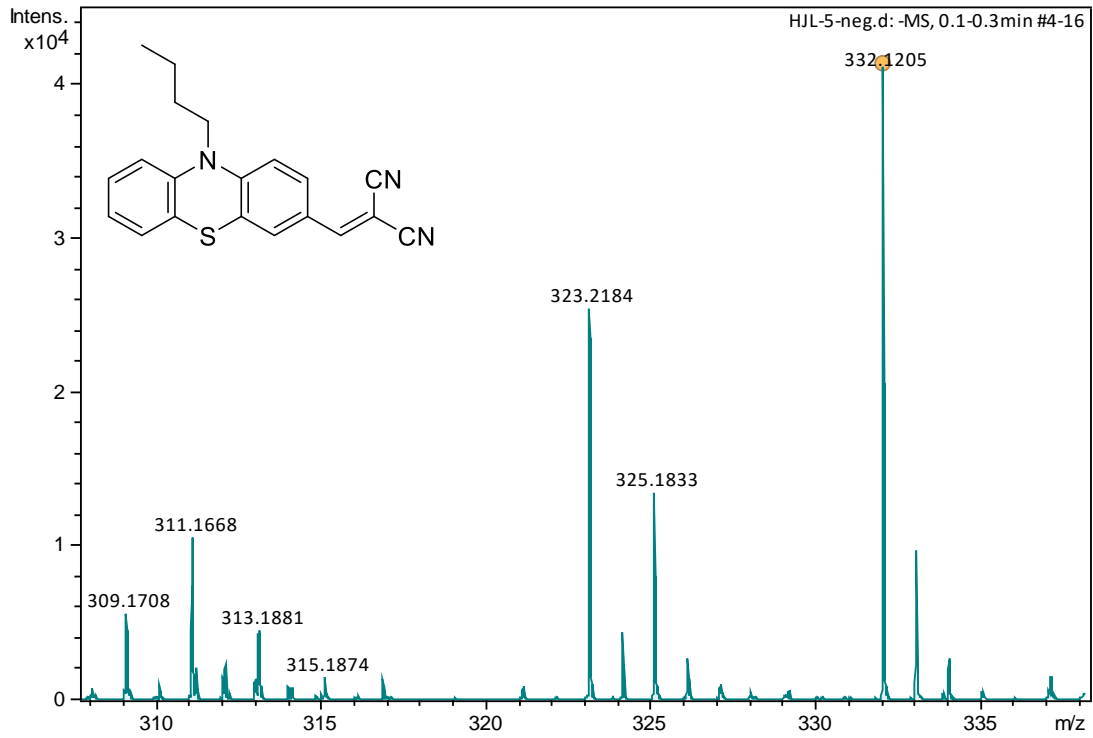

<sup>1</sup>H-NMR

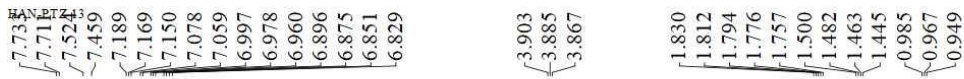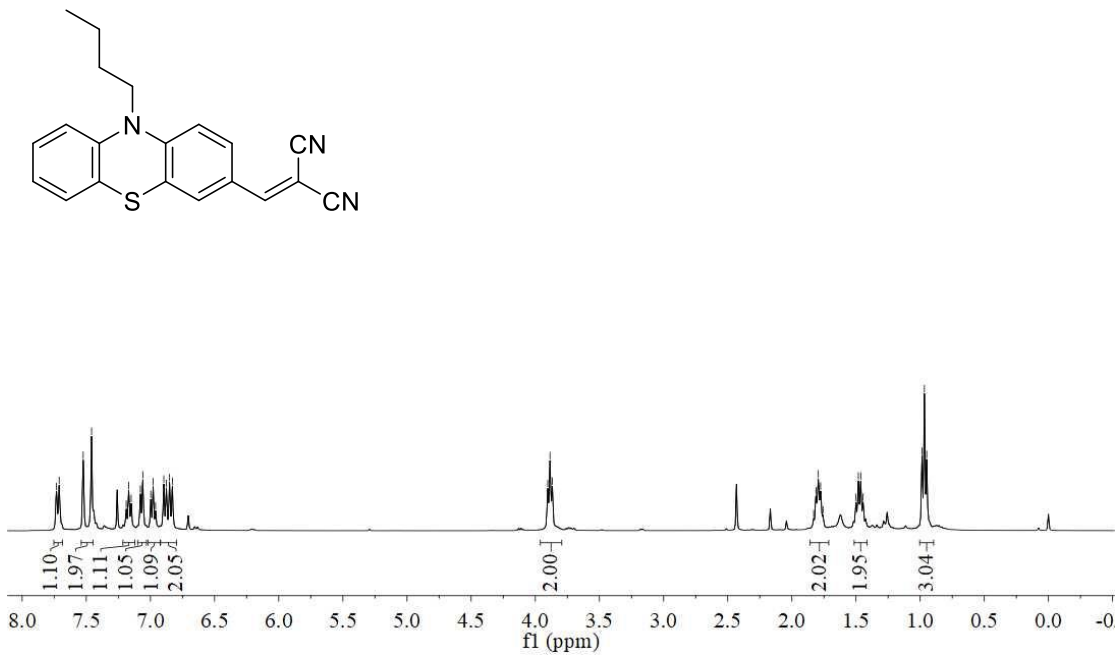

### <sup>13</sup>C-NMR

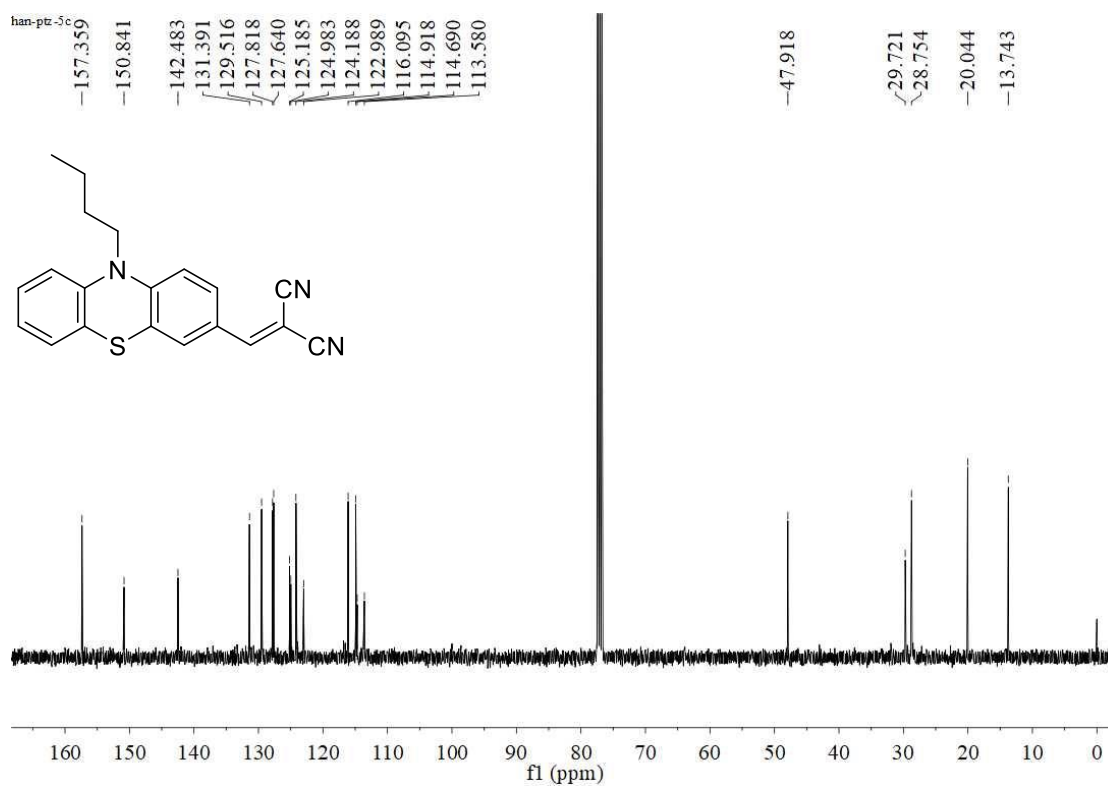

### PTZ6 HRMS

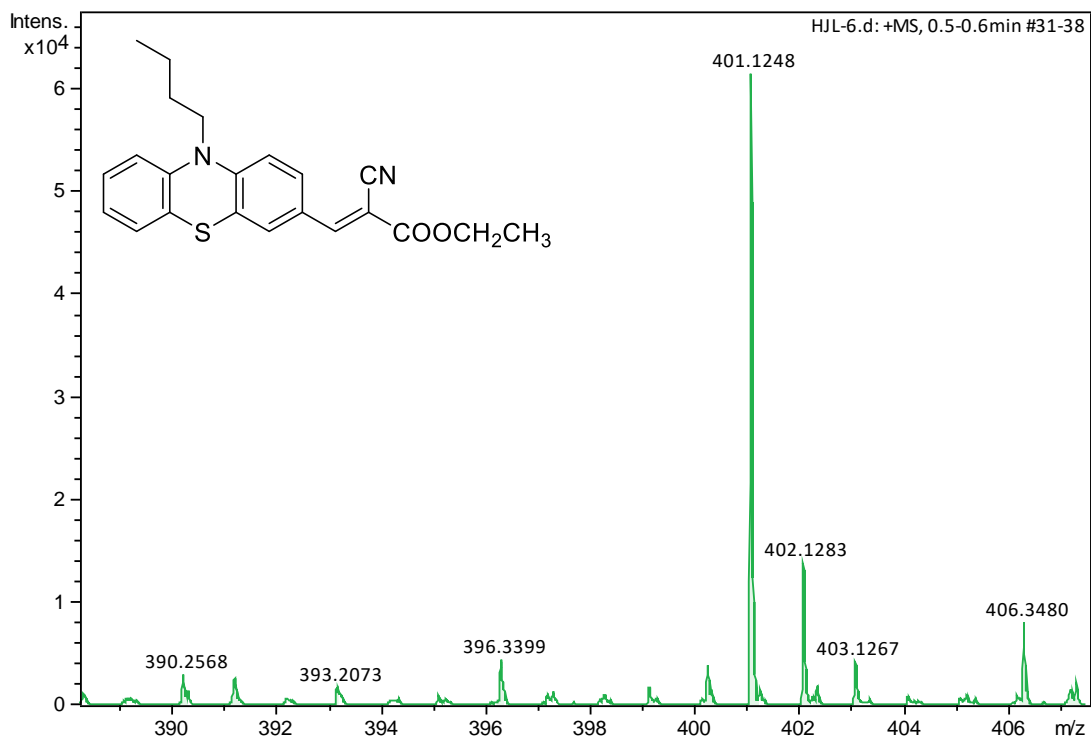

# <sup>1</sup>H-NMR

han-ptz-6

8.038  
7.883  
7.862  
7.648  
7.158  
7.140  
7.097  
7.078  
6.979  
6.960  
6.942  
6.885  
6.867  
6.846  
6.835  
4.366  
4.348  
4.330  
3.907  
3.898  
3.880  
3.862  
1.834  
1.816  
1.797  
1.779  
1.760  
1.498  
1.479  
1.460  
1.442  
1.402  
1.385  
1.367  
1.346  
0.981  
0.963  
0.944

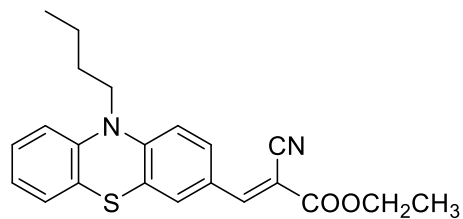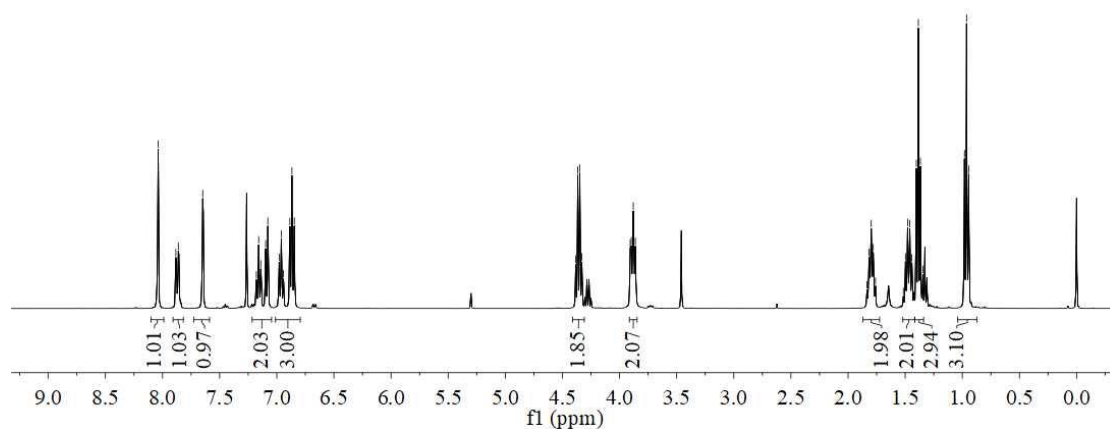

# <sup>13</sup>C-NMR

han-ptz-6c

-163.206  
-153.214  
-149.753  
-143.071  
-131.344  
-130.172  
-127.623  
-127.587  
-125.617  
-124.744  
-123.718  
-115.869  
-98.977  
-98.816  
-62.428  
-47.714  
-28.784  
20.079  
14.241  
13.765

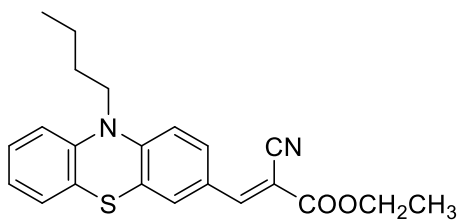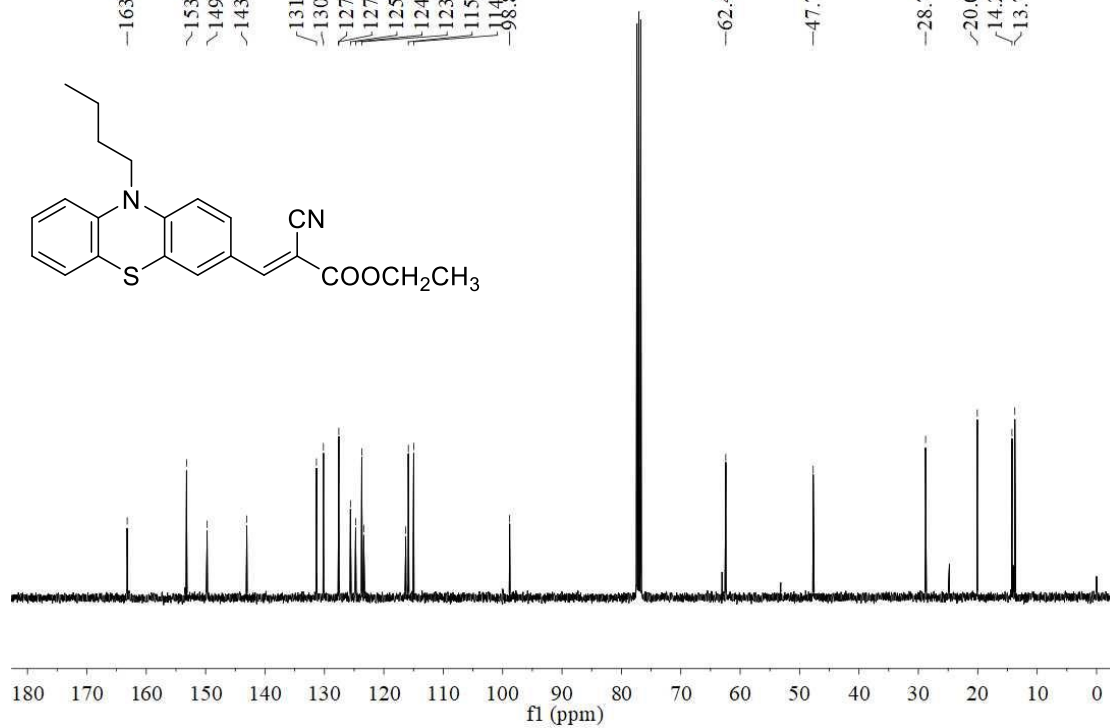

**PTZ7**  
**HRMS**

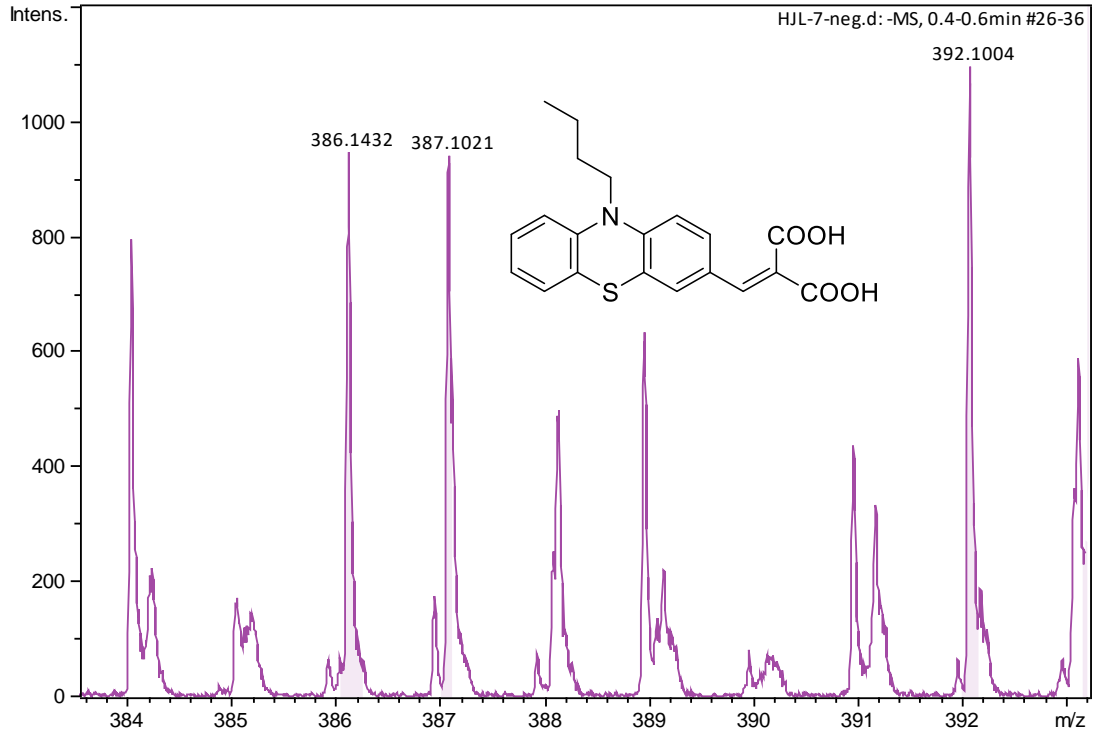

**<sup>1</sup>H-NMR**

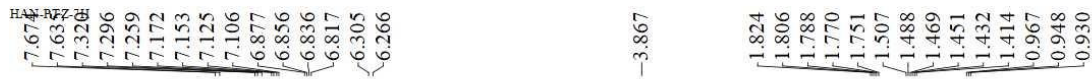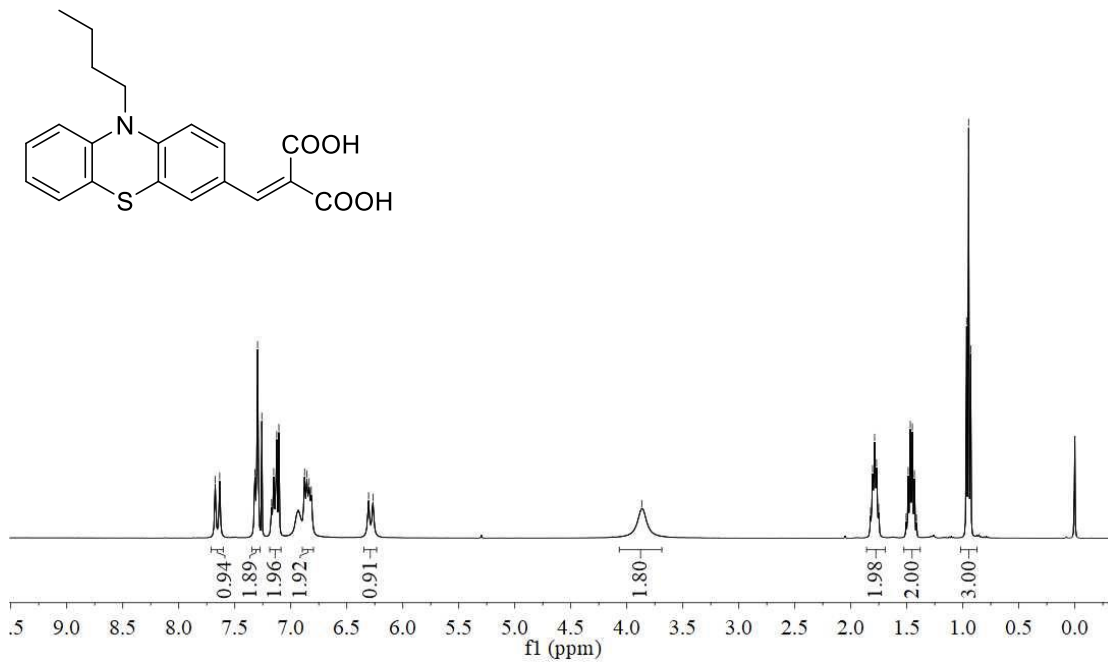

### <sup>13</sup>C-NMR

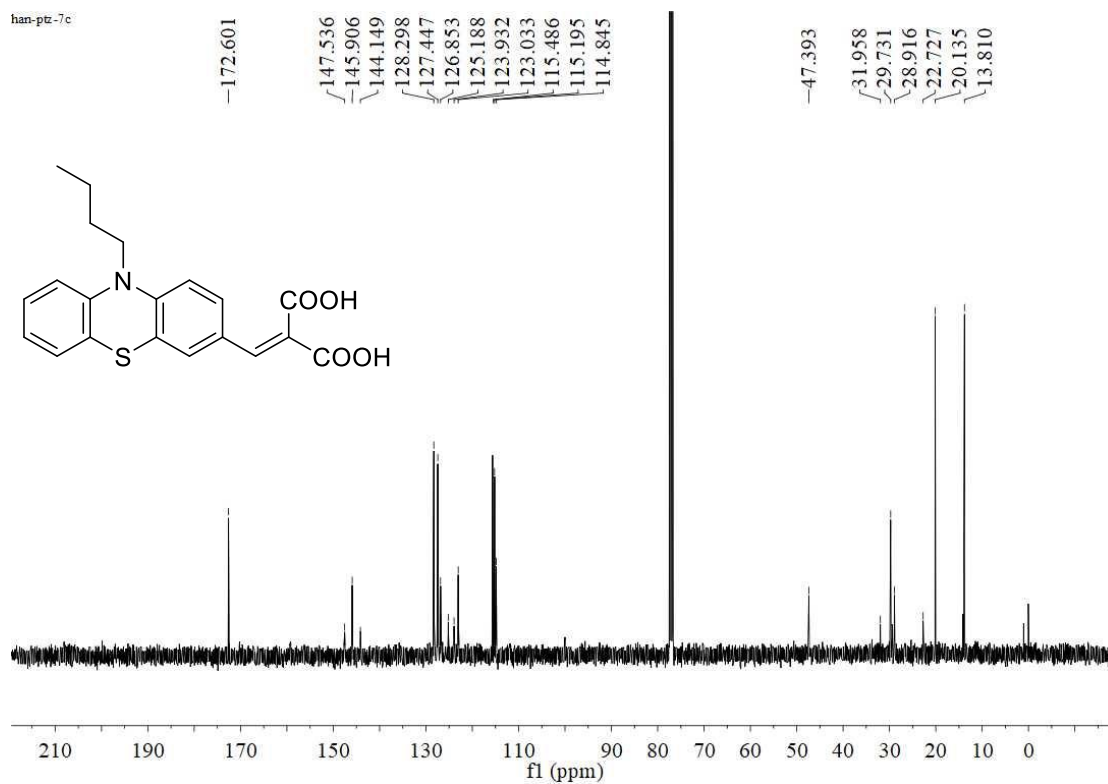

### PTZ8 HRMS

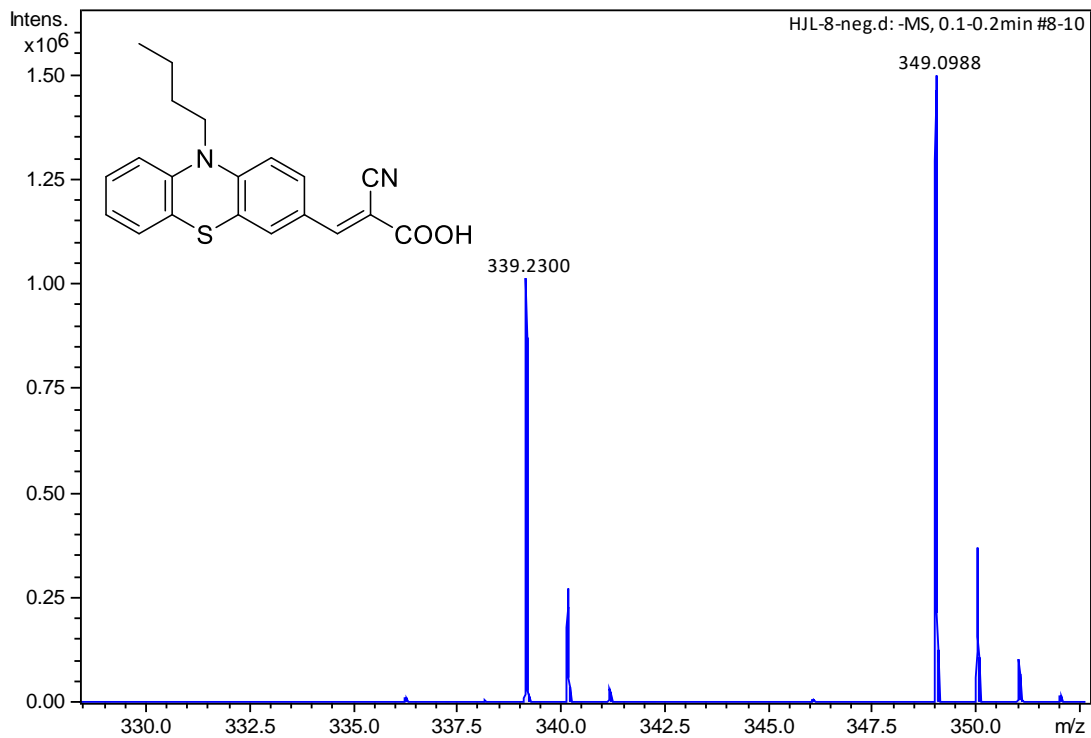

# <sup>1</sup>H-NMR

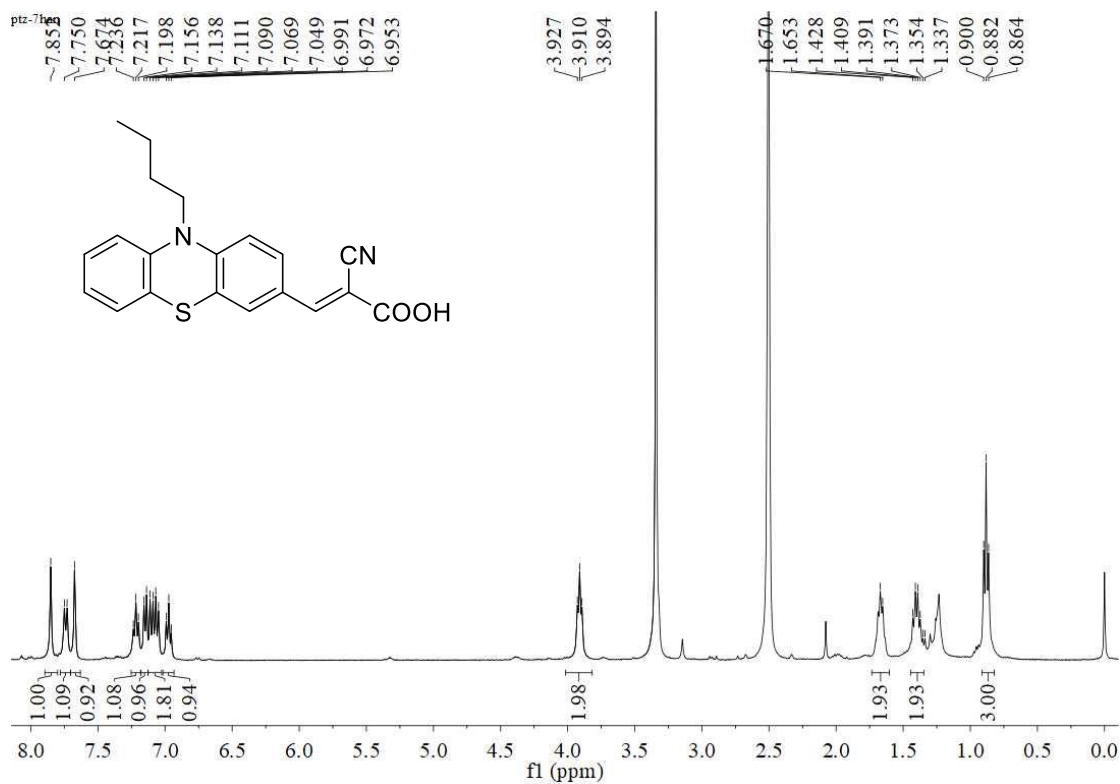

# PTZ9 HRMS

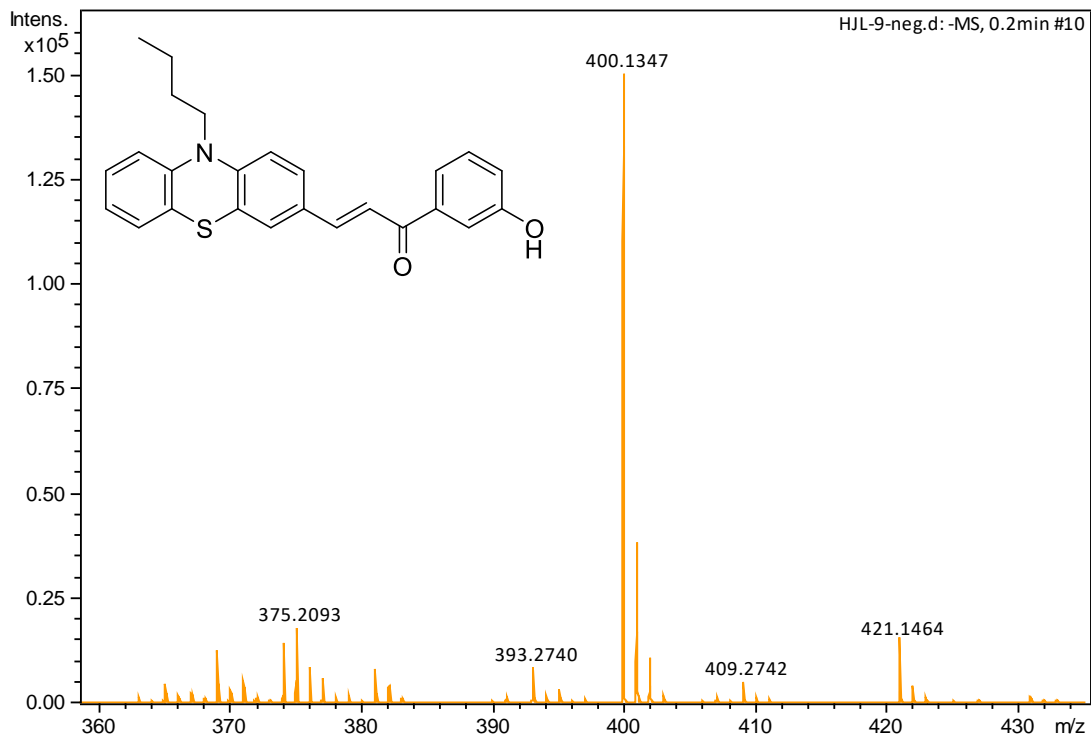

# <sup>1</sup>H-NMR

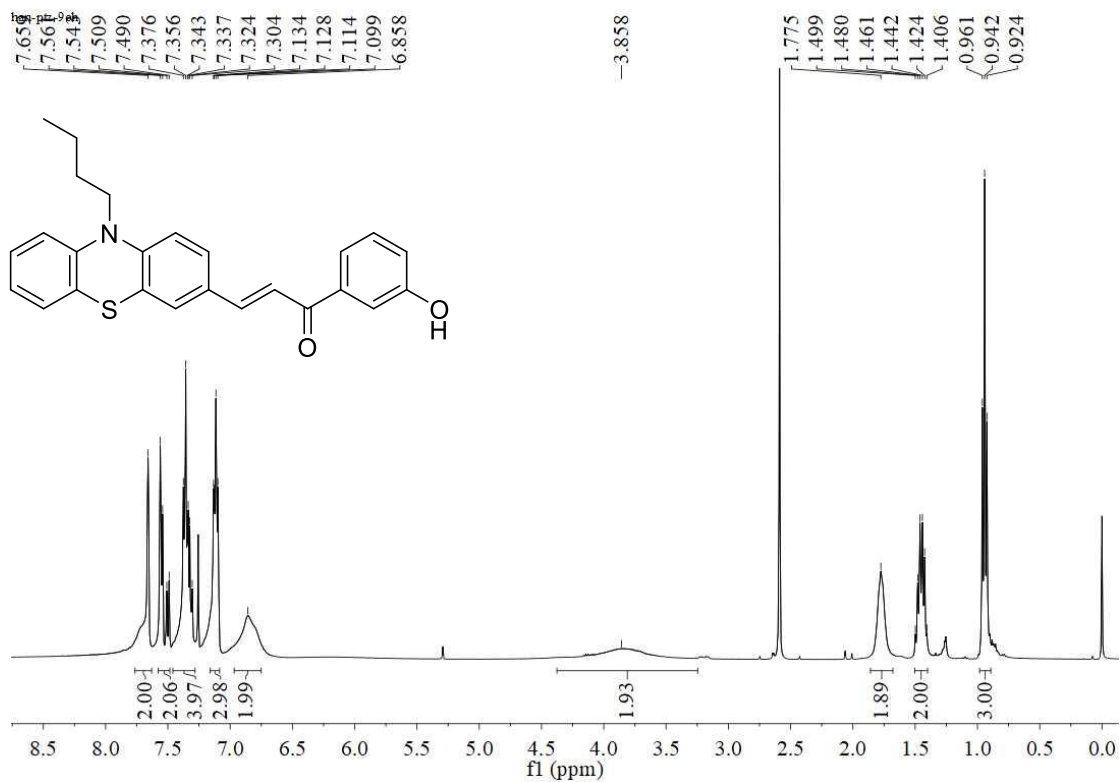

# <sup>13</sup>C-NMR

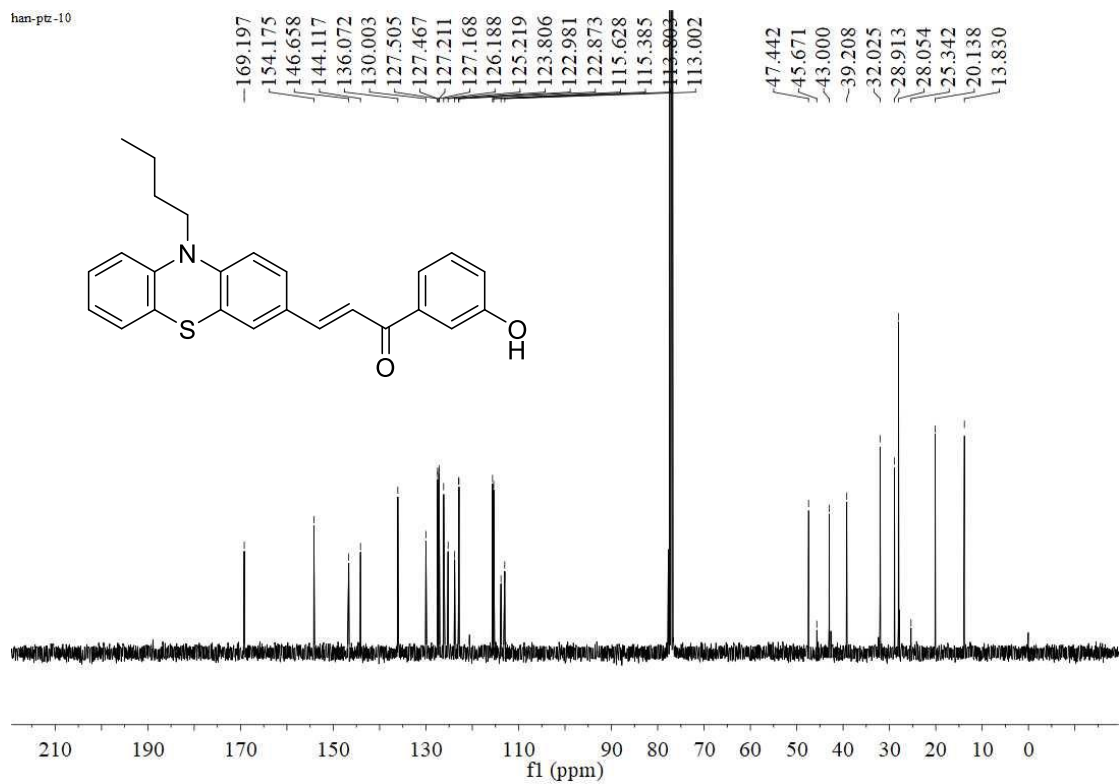



**PTZ10**  
HRMS

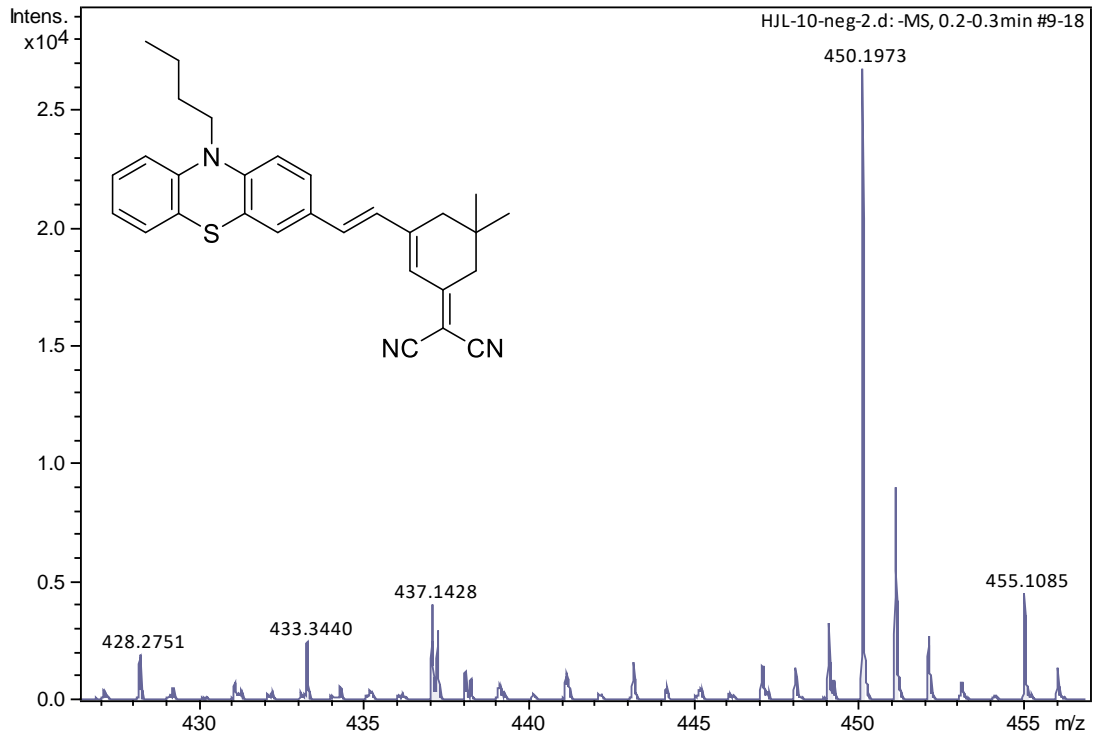

**<sup>1</sup>H-NMR**

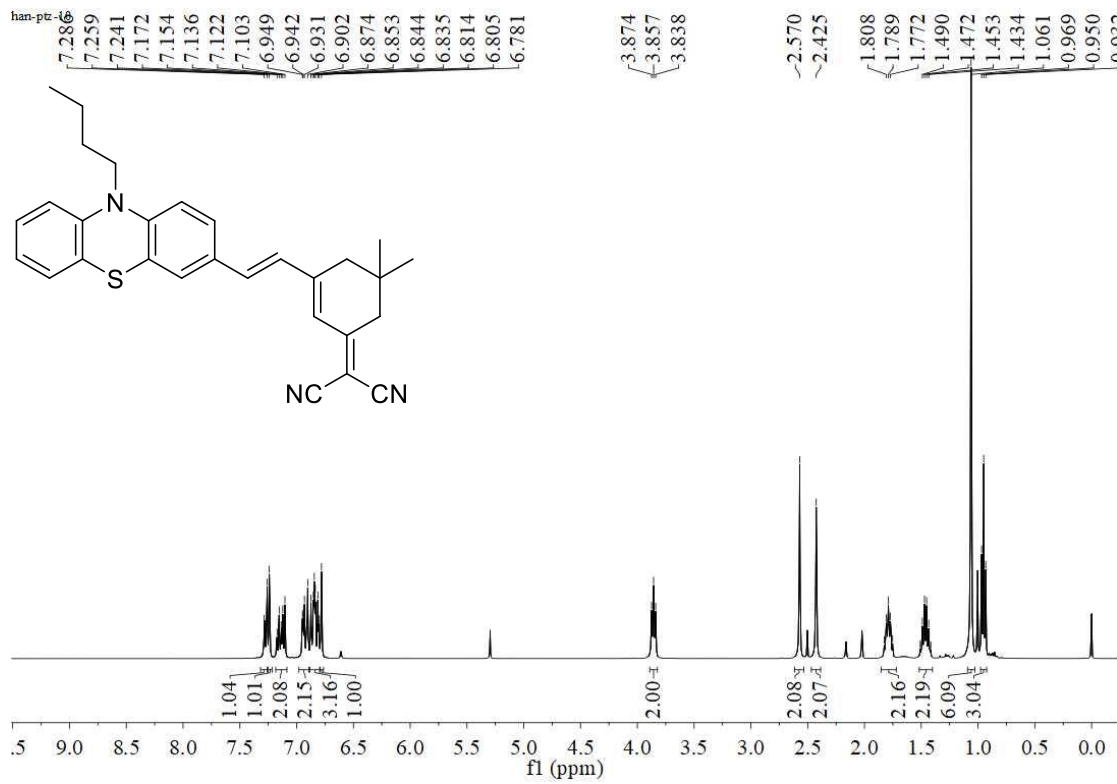

# <sup>13</sup>C-NMR

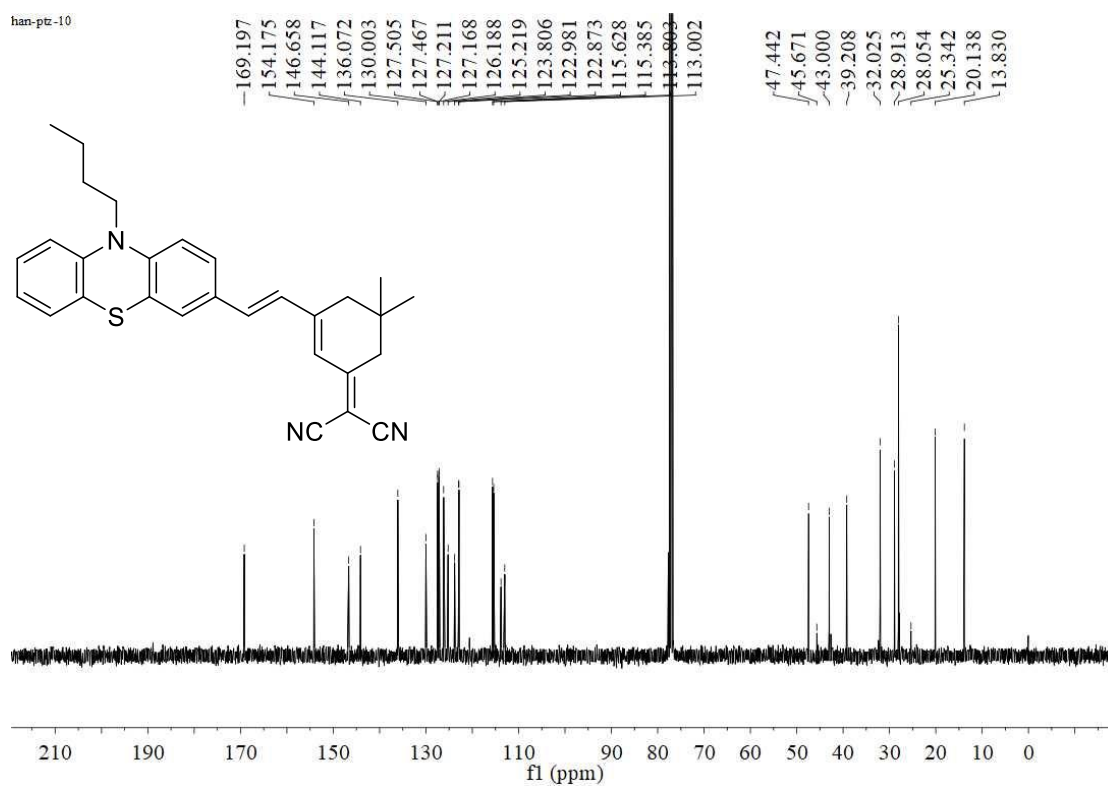

# PTZ11 HRMS

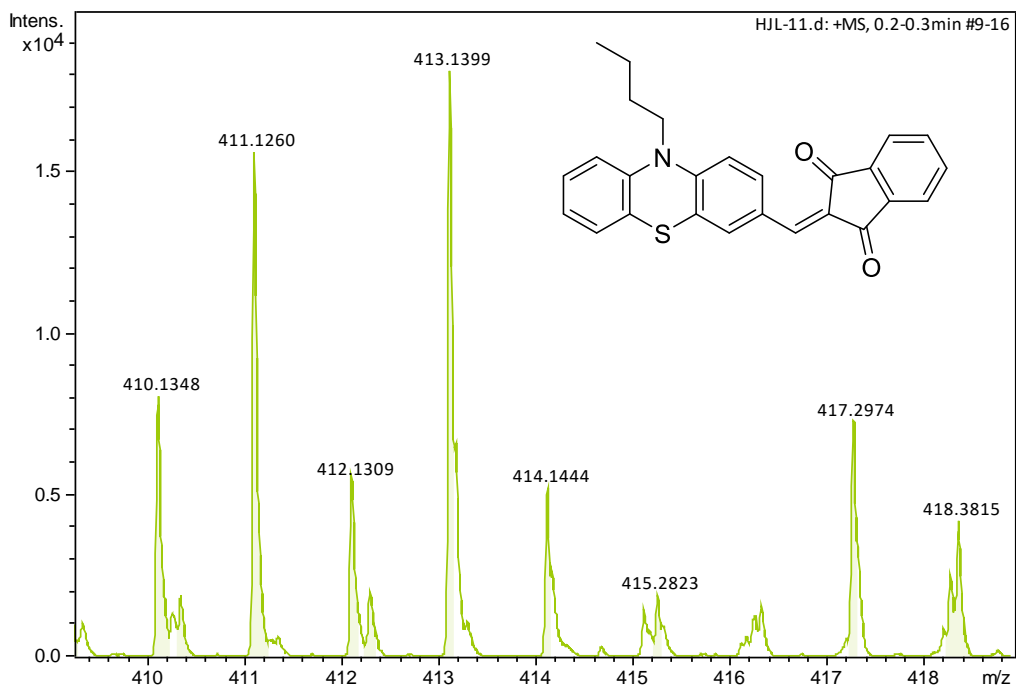

han-pz-11

8.351  
8.318  
8.296  
7.971  
7.951  
7.938  
7.765  
7.756  
7.747  
7.690  
7.160  
7.141  
7.121  
7.109  
7.087  
6.969  
6.950  
6.932  
6.881  
6.861

3.914  
3.895  
3.877

1.853  
1.834  
1.816  
1.797  
1.528  
1.509  
1.490  
1.472  
1.453  
0.989  
0.971  
0.953

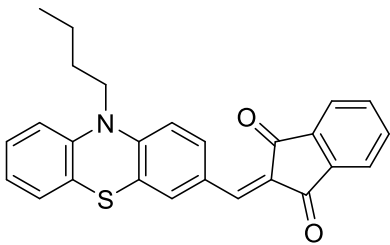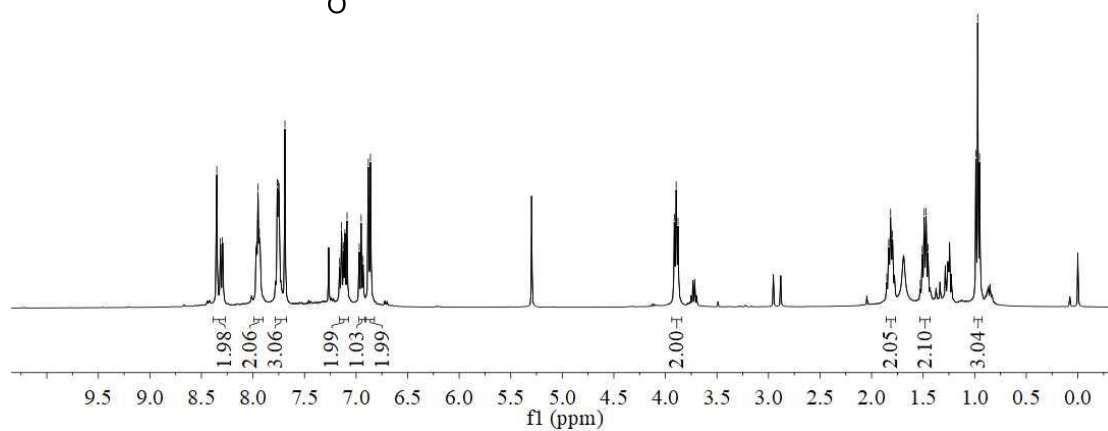

<sup>13</sup>C-NMR

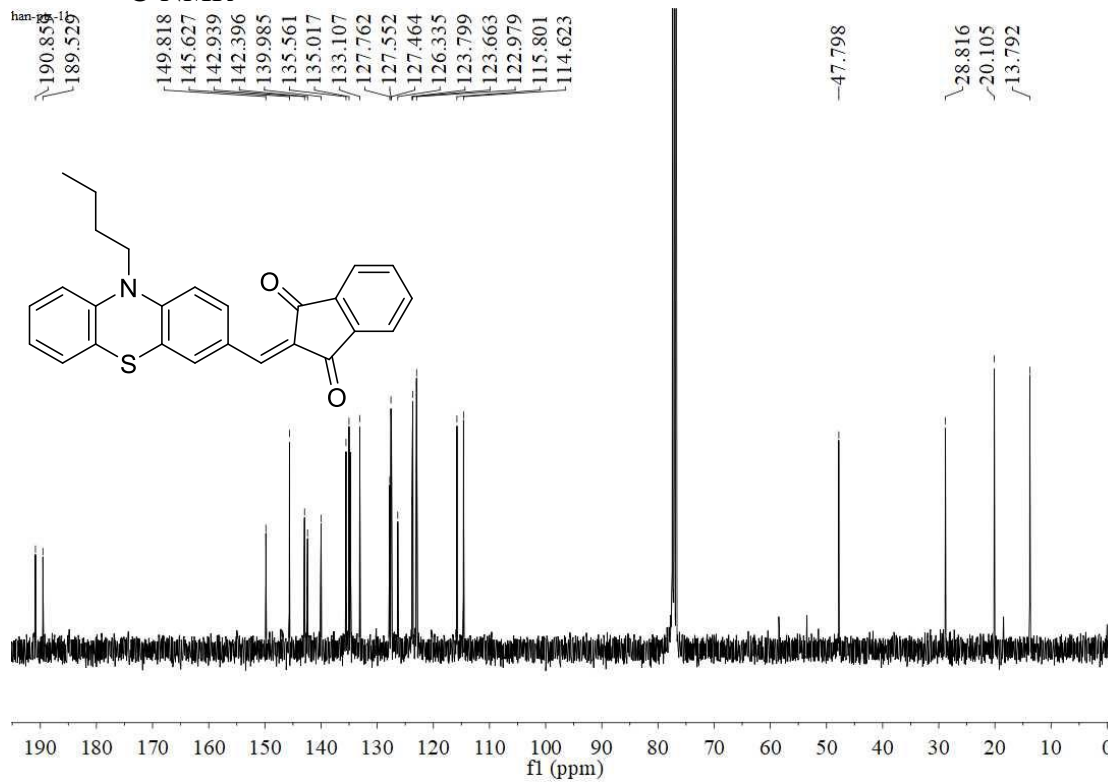

Supplement: c9tc00143c1.pdf [file c9tc00143c1.pdf]
